# Supplementary material for: Epigenetic Regulation of Cell Type–Specific Expression Patterns in the Human Mammary Epithelium
Source: PLoS Genet. 2011 Apr 21;7(4):e1001369. doi: 10.1371/journal.pgen.1001369 (PMC3080862; doi:10.1371/journal.pgen.1001369)
Supplement: Table S7 — List of genes associated with DMRs and K27-enriched regions. The file contains seven worksheets. Complete list of DMRs identified in CD44+ (1) and CD24+ (2) cells. List of DMR (-log10(p-value)>5) hypermethylated in CD24+ cells (CD24Met) (1) and DMR hypermethylated in CD44+ cells (CD44Met) (2). ID, -log10 (p-value), chromosomal location of the DMR, genes with the DMR in their promoter regions, genes with the DMR in their gene body regions, overlap with CpG island (P: yes, N: no), tag count in each MSDK-Seq library are indicated. Genes with DMR hypermethylated in CD24+ cells (CD24Met) in genebody (3) and promoter (4) and genes with DMR hypermethylated in CD44+ cells (CD44Met) in genebody (5) and promoter region (6). Gene symbol, RefSeq ID, gene description, and chromosomal location are indicated. (7) List of genes differentially expressed and associated with DMR and histone modifications. Genes showing DMR in promoter or genebody and also showing differentially expression between CD44+ and CD24+ cells. Gene symbol, RefSeq ID, gene description, chromosomal location, differential expression patterns and histone K27 enrichment (P: positive, N: negative) in their promoter regions in CD44+ cell and CD24+ cells are indicated. Data from Tables S3 and S5 are integrated into this table. (0.23 MB XLS) [file pgen.1001369.s014.xls]

## Sheet: DMR_CD24Met
ID	-log10(pvalue)	browser	PromoterDMR	GeneBodyDMR	CpG	N47-CD24+	N48-CD24+	N55-CD24+	N37-CD24+	N39-CD24+	N40-CD24+	N47-CD44+	N48-CD44+	N55-CD44+	N37-CD44+	N39-CD44+	N40-CD44+
33509	-52.1	chr17:1905507-1906909	HIC1	NA	P	80	19	10	157	4	34	681	735	757	747	438	309
12299	-48.2	chr5:139118912-139119158	NA	NA	P	6	1	0	15	3	14	103	246	261	313	303	230
7511	-47	chr3:52031609-52032259	NA	NA	N	14	5	2	144	1	20	153	253	208	805	140	285
1280	-45.9	chr1:40541528-40542864	NA	COL9A2	P	30	5	0	147	4	36	225	403	330	710	334	288
42227	-44.4	chr22:49362699-49364155	CPT1B	CHKB	P	22	9	20	59	13	54	121	193	220	807	235	816
32147	-42.1	chr16:19033603-19035108	ITPRIPL2	NA	P	14	2	0	115	3	39	139	154	182	820	234	610
3705	-41.6	chr1:245565729-245566204	ZNF496	NA	N	28	4	4	129	2	32	150	162	157	591	142	352
23986	-37.1	chr11:2887146-2888178	NA	SLC22A18	P	58	18	2	201	15	67	270	195	253	1158	2898	956
34330	-32.7	chr17:30785400-30785913	SLFN12	NA	N	288	120	204	467	127	214	372	530	433	1619	612	575
25974	-32	chr12:6751486-6753700	LAG3	NA	P	60	10	14	127	10	20	134	159	174	668	326	184
38148	-29.2	chr19:35964138-35964639	NA	NA	N	20	6	10	69	25	37	206	368	342	479	390	216
10995	-28.9	chr5:1931461-1932513	NA	IRX4	P	32	4	8	86	2	39	122	116	171	513	101	456
32014	-28.6	chr16:10819153-10821190	FAM18A	NA	P	14	4	6	42	1	19	78	115	178	327	239	310
23843	-28.1	chr11:546279-547218	NA	C11orf35	P	142	24	94	170	89	161	211	176	221	562	375	461
5238	-26.8	chr2:110664552-110665046	NA	NA	N	28	24	16	99	24	103	132	169	191	855	327	1237
269	-26.7	chr1:5665507-5666112	NA	NA	N	30	9	20	179	5	26	85	126	174	675	204	322
6652	-26.7	chr2:238443782-238444773	NA	RAMP1	N	24	3	6	52	4	17	374	482	334	283	2013	182
17708	-26	chr7:149093915-149095728	NA	ZNF467	P	26	8	2	64	3	41	371	571	513	313	1404	210
11044	-25.9	chr5:4451831-4452591	NA	NA	N	4	4	4	92	9	14	67	167	219	454	103	213
29304	-25.5	chr14:64823953-64824568	NA	NA	N	12	4	4	44	1	9	84	133	144	255	104	163
13952	-24.9	chr6:42179800-42181328	NA	NA	P	66	14	10	399	13	89	176	134	247	1468	516	667
441	-23.5	chr1:10621146-10622111	NA	CASZ1	P	6	1	6	52	2	26	78	90	75	532	74	620
35845	-22.9	chr18:1781965-1782620	NA	NA	N	36	14	18	114	15	47	119	126	165	699	318	279
17707	-22.7	chr7:149093197-149093915	NA	ZNF467	P	6	0	2	124	2	44	48	96	140	823	235	572
43418	-22.5	chrX:128069969-128073601	NA	NA	N	16	7	12	33	14	13	126	141	131	235	116	124
1168	-21.7	chr1:36559837-36560293	NA	C1orf113,FAM176B	P	12	5	0	30	1	10	54	101	96	462	87	608
23750	-21.1	chr10:134745659-134747168	GPR123	NA	P	58	18	34	79	45	75	154	201	219	355	217	254
28690	-21.1	chr13:112752759-112753689	NA	MCF2L	P	2	9	2	46	3	70	79	104	146	475	98	462
37533	-20.6	chr19:10788884-10789872	NA	DNM2	N	10	4	0	8	0	17	68	118	124	365	57	474
39246	-20.6	chr19:60288580-60290238	NA	EPS8L1	P	438	146	548	259	903	324	798	908	793	886	1148	1484
42085	-20.5	chr22:45067436-45068057	NA	TTC38	N	4	2	0	27	0	13	45	77	61	350	160	224
31001	-20.4	chr15:71402148-71403242	NA	HCN4	N	12	3	6	16	3	7	141	262	246	146	635	100
31852	-20.1	chr16:3007742-3008444	CLDN6,TNFRSF12A	NA	P	14	7	2	144	1	12	192	240	219	444	175	124
41936	-19.9	chr22:41066610-41067805	NA	NA	N	50	8	2	77	5	42	173	142	154	300	73	261
12744	-19.8	chr5:174090923-174092563	NA	NA	P	40	21	2	32	16	42	223	177	175	195	374	181
25966	-19.8	chr12:6599548-6600361	NA	LPAR5	P	56	38	40	122	291	197	115	169	205	764	616	808
39153	-19.3	chr19:57982130-57982703	ZNF600	NA	N	396	134	442	244	806	274	742	868	745	630	1048	973
32	-18.9	chr1:965449-966875	NA	AGRN	P	26	8	10	45	5	21	140	297	315	218	844	259
26611	-18.2	chr12:53097721-53098805	ITGA5	NA	P	444	43	86	343	85	163	351	469	416	1165	482	386
18306	-17.2	chr8:21972437-21973708	NA	EPB49	N	16	1	4	52	3	24	74	142	143	224	96	412
13931	-16.8	chr6:41635406-41636495	NA	FOXP4	P	30	6	2	47	8	47	138	78	62	353	763	564
36944	-16.5	chr19:1423971-1424563	NA	APC2,C19orf25	P	8	9	14	34	41	23	118	187	177	217	131	130
2694	-16.4	chr1:165871153-165872015	NA	RCSD1	N	54	2	16	67	18	21	79	80	116	356	104	301
29893	-16.2	chr14:101763359-101763782	NA	NA	N	20	3	0	59	0	6	120	151	128	276	44	183
33147	-15.6	chr16:83984020-83985933	NA	NA	N	70	31	88	61	59	66	200	272	330	234	203	369
37122	-15.2	chr19:3409873-3410239	NA	NFIC	N	10	3	0	35	3	23	41	67	68	249	52	319
8955	-14.7	chr3:197809444-197810340	NA	NA	N	6	1	2	29	2	13	81	52	32	231	58	307
566	-14.6	chr1:16035760-16037982	NA	FLJ37453	P	14	8	2	28	2	27	84	120	123	177	47	259
32765	-14.4	chr16:65140481-65141799	TK2,CKLF	NA	P	12	9	4	36	8	87	41	77	83	460	140	375
4642	-14.3	chr2:66526765-66527298	NA	MEIS1	P	6	0	4	37	1	28	32	50	57	271	61	528
10994	-14.1	chr5:1929330-1930779	NA	IRX4	P	8	9	0	83	4	44	96	76	111	457	144	408
32087	-14.1	chr16:14990415-14992253	NA	PDXDC1	P	8	1	0	27	7	31	39	50	46	514	364	669
17119	-13.6	chr7:100326607-100327650	UFSP1	ACHE	N	144	39	112	269	107	233	528	794	524	943	953	453
33542	-13.6	chr17:2702580-2703112	NA	GARNL4	P	348	40	166	382	111	134	280	413	306	810	214	515
15840	-13.5	chr7:5470885-5471418	NA	NA	N	286	114	180	462	119	194	360	508	408	1515	567	395
1366	-13.4	chr1:43804163-43804560	NA	PTPRF	P	4	3	2	58	5	81	38	55	49	314	106	349
33718	-13	chr17:7227838-7228126	NA	TNK1	P	12	1	0	29	7	78	56	60	48	223	55	391
1209	-12.7	chr1:38371629-38372409	NA	NA	N	42	1	22	14	3	15	68	71	77	212	44	313
38681	-12.7	chr19:49952799-49953489	NA	BCL3	P	14	6	0	55	0	32	63	62	86	529	115	595
32373	-12.6	chr16:30336678-30337078	NA	ZNF771	P	2	0	2	14	0	7	23	44	40	131	92	112
24594	-12.5	chr11:60532306-60532647	NA	CD6	P	28	4	14	21	9	17	49	102	159	166	118	330
17134	-12.4	chr7:100667580-100669025	CLDN15	NA	N	16	9	0	69	2	33	75	69	118	400	145	566
41496	-12.3	chr22:23711064-23712021	NA	NA	N	64	15	8	178	2	25	127	83	120	502	68	148
1322	-12.2	chr1:42383857-42384486	NA	NA	P	6	2	4	28	4	19	62	47	64	438	100	585
32890	-12.2	chr16:68641187-68643878	NA	PDXDC2	N	4	1	0	10	6	26	35	43	42	371	134	629
27172	-11.9	chr12:109535132-109536338	TCTN1	NA	P	12	15	26	102	35	68	71	81	93	670	157	553
30082	-11.7	chr14:105014952-105015832	NA	CRIP2	P	32	2	32	38	85	136	50	77	95	443	305	740
30073	-11.4	chr14:104948508-104949324	NA	NA	P	118	68	36	430	74	79	204	177	132	1354	417	481
33999	-11.2	chr17:17566681-17567114	NA	RAI1	P	6	0	10	29	18	24	30	35	74	338	86	789
5769	-11.2	chr2:161905460-161906233	NA	PSMD14	N	8	3	0	20	4	6	42	47	48	158	60	88
12434	-11.1	chr5:145419242-145419695	NA	SH3RF2	N	8	3	2	37	2	8	70	55	65	172	36	158
618	-11.1	chr1:17348211-17348568	NA	NA	P	28	13	36	69	21	41	59	73	71	309	94	532
33573	-11	chr17:3774459-3775410	NA	ATP2A3	P	18	2	2	52	0	16	131	147	160	460	29	270
24066	-10.9	chr11:8334982-8335611	NA	NA	N	2	0	0	2	0	6	36	34	40	79	40	184
22644	-10.8	chr10:69990259-69993020	TET1	NA	P	318	17	106	200	405	63	970	1254	872	458	2226	371
10932	-10.6	chr5:829463-830965	NA	NA	N	66	30	28	49	54	74	234	208	168	740	122	897
4912	-10.6	chr2:87579233-87579804	NA	NCRNA00152	N	12	0	2	24	0	53	109	61	49	129	106	150
5257	-10.6	chr2:111925711-111926282	NA	LOC541471	N	12	0	2	24	0	53	109	61	49	129	106	150
23614	-10.5	chr10:129226783-129227228	NA	NA	N	6	1	0	16	0	17	35	37	55	367	80	482
7432	-10.5	chr3:49307993-49308681	NA	USP4	N	30	7	14	60	3	21	66	67	67	402	37	222
20444	-10.3	chr9:76304809-76306449	NA	RORB	N	266	42	214	154	80	132	405	458	401	371	316	337
37886	-10.3	chr19:17779800-17780797	NA	B3GNT3	P	50	22	10	97	11	45	205	208	211	265	2432	253
13919	-10.2	chr6:41484309-41484620	NA	NA	P	24	5	0	30	0	14	40	50	44	182	49	306
4995	-10.2	chr2:96529889-96530353	NA	LINCR	P	32	5	8	37	15	72	62	86	78	246	61	328
38263	-10.1	chr19:40321109-40321499	LGI4,FXYD1,FXYD7	NA	N	12	2	0	27	1	6	50	74	70	183	30	197
42019	-9.8	chr22:43503722-43504686	NA	PRR5,LOC553158	P	94	83	134	289	171	399	190	221	228	1182	651	640
11701	-9.4	chr5:77182803-77183280	NA	NA	P	236	76	294	215	466	184	227	263	244	488	603	341
2457	-9.4	chr1:153040005-153041008	NA	KCNN3	N	46	6	36	36	38	24	53	62	104	240	193	421
26990	-9.4	chr12:95167253-95167785	NA	ELK3	N	30	3	4	40	4	22	44	40	51	215	63	131
36141	-9.4	chr18:20751585-20752650	NA	NA	N	10	4	8	70	3	13	75	43	71	394	91	266
1167	-9.3	chr1:36559514-36559837	NA	C1orf113	P	4	1	2	1	3	19	44	33	64	252	89	423
14453	-9.3	chr6:101953974-101955132	GRIK2	NA	N	16	1	0	24	5	40	40	33	32	171	116	389
6222	-9.3	chr2:208343626-208345088	FZD5	NA	N	92	16	30	151	130	152	145	71	70	667	2574	524
15669	-9.2	chr7:1242101-1243130	NA	UNCX	P	358	134	496	409	658	405	225	304	336	922	1095	639
3178	-9.2	chr1:212315265-212316516	NA	NA	N	8	0	2	15	2	13	24	47	50	245	62	269
4195	-9.2	chr2:28619355-28620494	NA	PLB1	N	24	7	4	155	2	16	104	133	105	769	81	72
29374	-9.1	chr14:69386410-69386933	NA	NA	P	38	14	12	86	7	29	47	75	62	376	126	164
36993	-9	chr19:1802315-1804042	REXO1	KLF16	P	6	6	6	27	8	200	42	47	93	339	140	389
23577	-8.9	chr10:126771728-126772824	NA	NA	N	4	0	0	8	3	18	19	36	47	218	119	490
26510	-8.9	chr12:50529248-50530517	NA	NA	N	18	7	6	102	47	188	36	49	41	480	198	467
32484	-8.9	chr16:33365886-33366417	NA	NA	N	148	60	90	310	55	152	257	215	200	619	406	373
34284	-8.8	chr17:27635197-27635299	NA	RHBDL3	N	4	0	0	9	0	4	31	27	17	97	43	121
34594	-8.8	chr17:38085517-38086759	PLEKHH3,CCR10,CNTNAP1	NA	P	10	8	14	19	4	8	45	51	95	204	39	142
26968	-8.7	chr12:94364326-94365121	NA	NA	N	26	7	2	67	1	22	49	48	60	324	60	336
29146	-8.5	chr14:53885528-53885815	NA	NA	N	2	6	20	5	5	22	27	45	63	124	69	251
23722	-8.1	chr10:134269925-134270243	NA	INPP5A	N	36	5	8	43	9	14	43	56	62	202	42	282
1362	-7.8	chr1:43796587-43797107	NA	PTPRF	N	36	10	6	35	7	28	61	51	68	314	80	254
33453	-7.8	chr17:1129138-1130045	TUSC5	NA	N	24	3	10	6	0	11	70	34	31	75	28	67
37838	-7.8	chr19:16999441-17000357	CPAMD8	NA	N	20	3	6	15	1	24	118	76	100	210	139	81
27235	-7.7	chr12:111978241-111980380	DTX1	NA	P	590	217	326	517	488	494	864	1277	1148	1173	1276	731
33192	-7.7	chr16:85071067-85072787	NA	NA	N	128	32	50	85	47	72	266	405	334	218	653	214
39118	-7.7	chr19:56796310-56796868	NA	NA	P	322	104	226	249	163	200	177	251	275	603	378	388
6327	-7.7	chr2:219444320-219444940	NA	WNT6	P	28	5	8	26	4	24	42	39	72	222	65	152
10992	-7.6	chr5:1927705-1928817	NA	NA	P	8	5	4	59	1	15	136	137	139	178	67	62
39096	-7.6	chr19:56293573-56294171	NA	ATPBD3	P	242	91	152	183	94	120	141	231	250	479	335	234
7689	-7.4	chr3:65316676-65317601	NA	MAGI1	P	0	0	0	3	0	5	37	22	29	55	35	81
21197	-7.3	chr9:128426063-128427213	NA	LMX1B	P	26	6	16	15	2	28	60	40	48	103	53	128
26384	-7.3	chr12:46621849-46623316	NA	NA	N	62	25	10	321	50	241	99	78	131	1029	534	548
31765	-7.1	chr16:2027917-2028379	NA	SLC9A3R2	N	6	0	0	2	0	14	45	21	37	250	64	271
25124	-6.9	chr11:74955213-74955651	NA	SERPINH1	P	4	2	8	3	1	22	15	37	31	119	48	165
30029	-6.8	chr14:104319773-104320462	NA	AKT1	N	2	2	2	0	1	20	26	27	29	150	65	392
6293	-6.8	chr2:217842944-217843933	NA	NA	N	4	2	6	13	1	1	27	33	23	97	20	201
26513	-6.6	chr12:50587912-50588241	ACVRL1	NA	N	8	6	0	55	1	16	27	37	25	182	116	190
27778	-6.6	chr13:19771947-19773880	NA	NA	P	24	6	2	10	4	28	59	37	29	96	91	85
23973	-6.5	chr11:2719264-2719812	NA	KCNQ1	N	88	12	56	57	68	57	103	130	112	323	115	313
25922	-6.5	chr12:4068841-4069059	NA	NA	N	10	1	2	8	1	4	38	28	32	91	19	34
34755	-6.5	chr17:42202347-42203359	NA	WNT3	P	10	2	6	28	1	33	31	26	57	298	80	487
6802	-6.5	chr2:242515915-242516316	NA	NA	N	2	0	0	18	0	3	49	33	33	150	16	64
31994	-6.4	chr16:9060855-9061676	NA	NA	N	6	0	0	22	2	13	16	20	26	255	63	273
1297	-6.3	chr1:41056200-41056846	NA	KCNQ4	P	126	9	20	58	9	21	146	108	143	236	35	211
1365	-6.3	chr1:43803861-43804163	NA	PTPRF	P	40	17	76	55	25	85	71	58	75	336	88	428
24276	-6.3	chr11:27211631-27212378	NA	NA	N	12	4	0	6	1	1	21	63	49	73	49	29
38732	-6.3	chr19:50593612-50594140	NA	PPP1R13L	N	46	12	12	44	2	30	79	90	111	224	21	209
16963	-6.2	chr7:93860666-93861161	COL1A2	NA	N	26	4	4	81	1	9	66	89	96	196	87	114
21318	-6.2	chr9:131120832-131121707	C9orf106	NA	N	0	0	0	10	0	4	31	24	28	84	15	170
23724	-6.2	chr10:134294664-134295006	NA	INPP5A	N	0	2	0	27	0	21	17	25	30	125	35	101
35861	-6.2	chr18:3209058-3209429	MYOM1	NA	N	2	0	0	9	0	1	13	18	14	74	21	33
27350	-6.1	chr12:117110988-117111177	NA	TAOK3	N	6	2	2	23	2	23	19	31	23	83	41	198
3107	-6	chr1:207915052-207916210	G0S2	NA	P	222	120	138	297	212	260	359	257	307	551	1282	597
34706	-6	chr17:40680484-40681936	LOC100133991	NA	P	672	242	724	497	777	753	1251	1369	779	1103	863	1021
4098	-6	chr2:25445106-25445494	NA	NA	N	2	1	2	18	0	4	21	21	40	365	64	349
5172	-6	chr2:107308883-107309312	NA	NA	N	18	12	12	27	34	64	39	47	45	287	102	626
13564	-5.9	chr6:27834417-27834781	NA	NA	N	6	1	10	16	0	3	15	26	30	115	25	138
15219	-5.8	chr6:169092910-169093634	NA	NA	N	16	2	4	53	6	30	56	51	110	627	461	578
26598	-5.8	chr12:52708818-52712049	NA	HOXC6,HOXC4,HOXC5	P	60	16	10	99	10	70	318	338	283	223	788	246
21135	-5.7	chr9:125847690-125848432	NA	NA	P	710	63	162	378	69	141	358	359	303	673	275	314
31713	-5.7	chr16:1497319-1497966	NA	TELO2	N	0	1	0	13	1	7	10	20	32	250	46	291
40635	-5.7	chr20:62143394-62145023	NA	NA	P	14	3	4	4	2	7	21	32	32	102	27	123
14137	-5.6	chr6:56219075-56219933	COL21A1	NA	N	30	0	4	30	42	52	73	54	58	94	164	158
21633	-5.6	chr9:138343181-138343650	NA	NA	N	0	0	0	0	0	7	14	16	27	113	26	164
31824	-5.6	chr16:2705239-2705892	NA	PRSS27	P	584	276	522	557	457	351	340	420	439	946	520	519
37066	-5.6	chr19:2462150-2463235	NA	GNG7	P	0	0	0	0	3	10	35	27	22	66	21	116
12504	-5.5	chr5:151046468-151047845	SPARC	NA	N	98	39	96	124	81	231	85	90	113	313	251	538
6728	-5.5	chr2:241368710-241370352	NA	KIF1A	P	18	15	22	22	262	103	62	117	81	154	314	209
81	-5.5	chr1:1364347-1365585	NA	VWA1	P	2	2	0	10	0	13	10	34	42	118	42	57
25895	-5.4	chr12:2870374-2871623	TULP3	NA	P	10	4	18	36	15	29	46	59	83	260	73	459
31446	-5.4	chr15:94587954-94588449	NA	NA	N	0	1	2	20	1	10	28	19	20	171	60	366
33152	-5.4	chr16:84046618-84046946	NA	NA	N	0	1	2	12	0	6	8	19	28	125	15	207
37034	-5.4	chr19:2164837-2165200	NA	DOT1L	P	4	0	0	3	1	3	12	39	30	117	47	157
9146	-5.4	chr4:2270067-2271260	NA	ZFYVE28	N	2	2	0	16	1	7	27	22	23	95	38	142
23616	-5.3	chr10:129423593-129425384	FOXI2	NA	P	194	28	200	243	143	237	151	211	202	453	217	494
281	-5.3	chr1:6048057-6048711	NA	KCNAB2	N	16	1	2	26	3	15	66	49	76	226	20	119
37057	-5.3	chr19:2375285-2376359	NA	TMPRSS9	P	20	2	2	15	29	112	24	30	42	211	149	366
7679	-5.3	chr3:63931519-63931935	NA	ATXN7	N	0	0	0	5	1	23	7	15	26	77	41	93
13407	-5.2	chr6:18230255-18230769	NHLRC1	NA	P	4	2	0	11	1	2	17	21	28	76	21	49
149	-5.2	chr1:2037385-2037531	NA	PRKCZ	N	8	1	2	9	0	6	23	18	26	79	70	251
15130	-5.2	chr6:164053311-164053503	NA	NA	N	8	1	0	7	0	4	18	18	42	134	68	189
21200	-5.2	chr9:128440199-128441013	NA	LMX1B	N	134	4	16	91	10	30	80	99	108	493	65	598
2467	-5.2	chr1:153310461-153311029	NA	NA	P	2	1	2	0	0	3	21	18	20	53	13	153
37696	-5.2	chr19:13933699-13934940	NA	RFX1	P	10	2	2	0	5	38	35	21	13	68	92	308
41872	-5.2	chr22:39140516-39141738	NA	MKL1	N	10	1	0	15	0	25	40	18	24	179	38	114
42104	-5.2	chr22:45448542-45449421	NA	GRAMD4	N	24	3	6	17	1	11	30	32	28	116	15	314
6211	-5.2	chr2:208008216-208009182	NA	NA	N	0	1	0	11	1	3	23	18	24	92	52	54
8169	-5.2	chr3:129277991-129278326	NA	NA	P	22	3	2	14	0	5	25	24	37	103	26	147
8170	-5.2	chr3:129278416-129279444	NA	NA	P	28	7	4	40	7	34	68	33	57	237	74	496
30433	-5.1	chr15:38358969-38361309	NA	NA	P	66	6	16	53	24	51	49	40	69	207	97	449
34686	-5.1	chr17:40392364-40393921	NA	C1QL1	P	206	103	158	293	205	158	292	375	337	529	316	299
40152	-5.1	chr20:43378626-43378827	NA	RBPJL	P	166	25	82	102	91	84	93	149	139	315	300	247
19375	-5	chr8:120753339-120754691	NA	NA	N	282	49	254	374	115	160	168	130	161	754	300	616
36234	-5	chr18:30952171-30952348	NA	MAPRE2	N	2	0	0	7	0	3	9	15	30	45	20	86
42222	-5	chr22:49314626-49314879	SCO2,TYMP	NA	P	6	3	12	30	3	6	27	23	33	100	25	133

## Sheet: DMR_CD44Met
ID	-log10(pvalue)	browser	PromoterDMR	GeneBodyDMR	CpG	N47-CD24+	N48-CD24+	N55-CD24+	N37-CD24+	N39-CD24+	N40-CD24+	N47-CD44+	N48-CD44+	N55-CD44+	N37-CD44+	N39-CD44+	N40-CD44+
37148	52.1	chr19:3638594-3639677	NA	PIP5K1C	P	556	207	594	318	541	518	9	11	10	52	78	80
22467	49	chr10:48022748-48023192	NA	NA	N	408	170	300	272	480	242	1	0	0	6	26	2
14099	43.3	chr6:52476138-52477466	NA	TRAM2	N	420	199	422	216	588	509	10	4	17	42	131	36
25990	40.6	chr12:6941502-6943649	NA	NA	N	732	395	688	448	911	550	11	17	15	33	350	8
9588	40.2	chr4:40060027-40060615	NA	NA	N	402	128	308	200	259	221	1	1	3	9	15	7
19670	36	chr8:144522991-144523631	RHPN1	NA	N	558	182	676	264	426	268	13	22	26	48	7	48
13081	34.7	chr6:1328280-1329746	NA	NA	P	1366	388	872	1375	1090	784	189	113	145	824	465	407
28294	32.4	chr13:72534578-72534980	NA	KLF5	N	296	231	456	153	422	197	1	0	2	28	21	2
35818	31.6	chr18:389086-389772	NA	COLEC12	N	452	118	284	260	379	288	2	5	12	34	26	28
13309	31.5	chr6:12395196-12396375	EDN1	NA	N	750	290	668	291	509	487	5	9	5	24	164	13
3309	30.7	chr1:224369725-224370533	NA	NA	N	270	98	332	153	362	344	1	1	1	29	68	24
27148	30.1	chr12:108638167-108639067	NA	NA	N	394	163	370	197	231	272	2	2	4	59	5	13
23659	30	chr10:131655725-131656411	EBF3	NA	P	490	197	504	435	474	388	21	18	22	57	151	43
41793	29.1	chr22:36764615-36764999	NA	NA	P	344	109	348	170	249	279	0	5	9	25	35	18
35242	28.6	chr17:67630674-67631997	NA	SOX9	P	514	234	534	654	1087	797	32	45	31	290	523	144
32929	28.6	chr16:70200881-70201824	NA	NA	N	270	108	406	350	236	98	4	0	3	6	6	3
31053	28.2	chr15:73279296-73280418	C15orf39	NA	N	808	374	652	836	731	812	73	81	68	142	304	79
35298	27.3	chr17:70267271-70268852	NA	SLC9A3R1	N	1834	901	1546	1633	2453	782	133	172	97	130	1470	19
24045	26.4	chr11:6608304-6608907	NA	DCHS1	P	376	79	408	261	478	261	3	0	0	33	90	17
34922	26.2	chr17:46350274-46350650	NA	NA	N	326	126	336	178	295	266	0	3	1	29	73	24
8507	26.2	chr3:159460431-159461404	NA	RSRC1	N	188	116	214	125	288	295	0	0	6	14	46	12
5950	25.8	chr2:176724613-176725139	HOXD4	NA	P	360	134	382	352	661	400	21	18	21	69	193	53
36244	25.7	chr18:31738872-31739836	NA	NA	N	218	100	198	134	332	362	0	3	4	30	88	19
41463	24.3	chr22:22553828-22554742	NA	SLC2A11	P	212	129	188	147	308	213	0	2	5	15	28	11
8280	24.3	chr3:135853746-135854990	KY	NA	N	280	88	156	145	212	276	1	1	1	14	35	5
42135	24	chr22:47310657-47311004	NA	FAM19A5	N	714	193	694	332	282	302	4	1	7	40	73	36
21558	23.9	chr9:136861930-136862790	NA	COL5A1	N	204	121	298	136	409	288	3	6	11	31	41	30
31806	23.4	chr16:2485801-2486690	NA	TBC1D24	P	218	133	318	126	223	210	0	4	4	30	32	13
834	23.2	chr1:25233244-25234408	NA	NA	N	392	89	320	172	491	292	6	5	4	22	20	25
24350	22.7	chr11:34548758-34549588	NA	NA	N	362	158	358	186	383	325	21	35	18	35	71	54
33201	22.6	chr16:85122622-85123400	NA	MTHFSD	P	324	153	302	102	162	120	7	9	9	18	7	18
38749	22.5	chr19:50748579-50748969	NA	OPA3	P	266	98	238	191	222	233	3	1	3	39	49	30
15070	22.1	chr6:159574160-159574925	NA	FNDC1	P	472	131	446	275	352	381	18	23	19	74	79	89
24612	22	chr11:61012901-61013717	NA	C11orf66	N	476	246	380	474	927	571	41	62	48	138	348	62
35247	21.8	chr17:68139342-68139823	NA	NA	N	606	100	140	220	424	298	7	4	1	11	55	8
34705	21.6	chr17:40674314-40674555	NA	FMNL1	P	154	87	204	96	410	324	0	1	4	4	100	8
6025	21.4	chr2:187762389-187763600	NA	NA	N	250	151	194	118	200	266	5	2	9	3	35	2
27838	21.1	chr13:23167318-23168304	NA	NA	P	528	273	264	330	710	270	17	22	23	68	257	10
27281	20.8	chr12:113370520-113371534	NA	NA	P	352	132	344	200	360	396	25	26	20	62	106	91
37046	20.4	chr19:2221939-2223221	NA	OAZ1	P	878	502	788	633	1408	408	44	98	93	182	804	42
18600	19.8	chr8:38950625-38951314	HTRA4	NA	P	648	180	574	301	426	410	31	54	44	92	91	98
15006	19.2	chr6:155300872-155301574	NA	NA	N	178	76	180	133	269	312	2	0	1	20	81	15
23882	19.2	chr11:814265-814727	EFCAB4A	PNPLA2	P	158	76	278	87	272	196	2	1	0	4	18	7
39528	19.2	chr20:3601173-3601571	NA	ADAM33	P	366	130	368	154	286	233	19	26	10	57	44	92
7890	19.2	chr3:101835912-101836584	NA	GPR128	N	264	130	184	274	263	165	9	5	10	49	58	20
21255	19	chr9:130052397-130052729	NA	DNM1	P	336	95	338	158	303	253	25	11	26	63	58	100
23977	18.9	chr11:2816106-2817140	NA	KCNQ1	N	166	83	258	168	420	339	1	8	8	21	45	35
4962	18.8	chr2:95305384-95305572	PROM2	NA	N	180	77	172	93	179	161	0	5	1	20	26	14
24738	18.7	chr11:63884272-63885555	RPS6KA4	NA	N	468	135	414	232	1889	714	35	32	24	54	438	82
1080	18.4	chr1:32998333-32998537	NA	KIAA1522	N	152	61	226	86	180	205	2	0	0	16	25	18
10754	18	chr4:184877233-184877784	NA	NA	N	162	112	290	134	282	265	0	4	1	11	92	17
8928	17.9	chr3:197015148-197016507	NA	MUC4	N	554	165	482	350	545	366	36	36	18	236	49	65
11039	17.8	chr5:3793829-3794149	NA	NA	N	126	79	204	53	114	93	0	0	1	1	0	3
29501	17.8	chr14:75763866-75765069	NA	NA	N	652	162	474	535	500	316	16	2	8	10	219	2
19814	17.4	chr8:145748032-145749064	NA	KIAA1688	N	170	114	128	145	370	183	0	0	3	5	15	2
34154	17	chr17:22592605-22593360	NA	NA	N	120	95	144	68	340	143	0	0	0	5	48	12
29249	16.9	chr14:60816614-60817616	TMEM30B	NA	P	572	232	546	663	462	422	73	84	109	336	194	133
17761	16.8	chr7:150494254-150495419	GBX1	NA	P	470	121	480	266	389	308	28	29	40	82	46	67
18568	16.7	chr8:37818758-37818992	NA	GPR124	P	194	75	240	136	166	200	4	8	6	24	28	21
14589	16.6	chr6:112008739-112009224	NA	TRAF3IP2	N	128	121	234	275	195	98	1	3	3	8	36	6
30067	16.6	chr14:104873377-104873649	NA	PACS2	N	128	72	252	97	207	182	1	1	3	16	35	12
9545	16.4	chr4:37833023-37834188	NA	NA	N	752	252	386	296	117	204	9	10	33	29	18	19
2669	16.3	chr1:163588523-163589031	NA	NA	P	330	103	364	217	400	374	22	21	25	74	99	139
29927	16.2	chr14:102485701-102486160	NA	CDC42BPB	N	310	68	200	122	258	231	3	6	3	28	59	20
7473	16.1	chr3:50354676-50355177	RASSF1	ZMYND10	N	156	150	204	146	102	119	0	3	2	4	13	6
6036	16	chr2:190154299-190154985	SLC40A1	NA	N	716	240	732	569	1084	564	114	106	102	259	352	226
14921	15.8	chr6:150010166-150010929	NA	NA	N	616	220	494	716	520	408	31	54	74	569	243	201
3102	15.6	chr1:207593520-207594377	NA	NA	N	248	83	252	152	445	377	3	13	12	53	121	84
30848	15.5	chr15:63474931-63476586	NA	NOPE	P	342	135	344	299	576	453	39	27	30	108	155	90
32590	15.4	chr16:49745512-49746412	SALL1	NA	P	992	180	606	1137	733	506	164	68	100	277	316	55
34520	15.1	chr17:36933623-36933830	KRT15	KRT19	N	240	108	302	138	191	187	11	17	11	61	26	51
30008	15	chr14:104047911-104048666	NA	NA	N	558	155	462	218	158	239	33	43	36	129	37	111
5091	14.1	chr2:102169906-102170013	IL1RL2	NA	N	110	47	162	57	151	138	0	1	0	9	28	17
11848	14	chr5:92932952-92933893	FLJ42709	NA	P	304	103	296	213	404	440	14	26	18	74	96	95
6725	13.7	chr2:241289136-241289843	NA	NA	P	320	123	310	196	161	234	15	9	16	41	44	49
39079	13.6	chr19:55897746-55898321	NA	SHANK1	N	680	261	794	385	247	291	126	132	111	116	80	102
14441	13.2	chr6:101012109-101012821	NA	SIM1	P	326	85	296	130	156	178	22	12	19	35	43	55
29340	13.2	chr14:68164732-68164869	NA	NA	P	92	42	96	62	93	114	0	0	0	8	8	20
10673	13.1	chr4:174574000-174574983	NA	NA	N	184	62	152	131	252	311	10	8	1	26	31	56
25677	13.1	chr11:125967739-125968094	NA	KIRREL3	N	166	88	238	50	285	160	0	0	0	7	0	9
2548	12.9	chr1:155145153-155145396	NA	PEAR1	P	116	41	106	69	94	126	0	1	1	8	15	10
259	12.9	chr1:4744726-4744852	NA	NA	N	126	37	138	56	142	85	0	0	0	3	8	3
5003	12.8	chr2:96801726-96801854	NA	CNNM4	N	106	39	74	42	110	62	0	0	0	2	6	3
5058	12.8	chr2:100165878-100166184	NA	NA	N	236	56	188	132	160	153	5	6	2	13	4	18
39289	12.7	chr19:60848043-60848339	ZNF581,CCDC106	NA	P	88	39	128	73	206	151	0	0	2	16	60	44
19801	12.5	chr8:145702793-145703162	MFSD3	GPT	P	162	55	182	101	266	182	2	6	15	37	26	43
27334	12.5	chr12:116282766-116284170	NOS1	NA	P	2266	872	1878	1988	988	737	598	556	549	1530	585	432
17938	12.4	chr7:157170444-157171905	NA	PTPRN2	P	576	200	584	319	239	356	104	85	132	243	66	120
31094	12.4	chr15:75184679-75185214	NA	NA	N	86	102	238	79	238	151	0	3	1	5	32	6
34411	12.4	chr17:33920404-33920836	NA	NA	P	558	126	516	200	276	303	35	44	42	85	51	95
9031	12.4	chr4:664503-666354	NA	MYL5,MFSD7	P	872	214	766	484	632	556	35	81	68	417	155	153
34812	12.1	chr17:43958795-43960646	NA	NA	P	516	183	334	395	910	798	72	33	58	274	537	330
16113	11.9	chr7:27165249-27166476	HOXA7	NA	P	180	86	196	88	289	277	8	22	13	19	57	46
23940	11.8	chr11:1808266-1808496	SYT8	NA	N	116	41	140	65	168	178	1	2	0	13	17	30
34903	11.8	chr17:45899927-45900952	CHAD	ACSF2	P	436	168	350	285	491	352	53	74	59	78	93	76
29808	11.7	chr14:99195656-99196488	NA	HHIPL1	P	190	74	144	82	100	157	12	16	11	25	13	41
3104	11.7	chr1:207668160-207668654	LOC642587	NA	N	144	37	98	111	318	302	0	0	0	14	141	14
1311	11.6	chr1:41722799-41723297	EDN2	NA	N	226	85	244	119	343	291	1	9	3	59	72	67
24772	11.6	chr11:64568290-64568443	NA	SAC3D1	N	80	39	118	46	182	106	0	0	0	0	14	6
41353	11.2	chr22:19109959-19110725	NA	SCARF2	P	606	97	488	597	1035	401	24	30	16	76	222	78
39989	11.1	chr20:34918220-34918748	NA	C20orf117	N	362	93	254	174	324	215	27	28	31	41	46	32
16168	11	chr7:29889743-29890110	NA	WIPF3	N	192	63	234	154	160	198	11	12	15	28	29	41
33080	11	chr16:80236400-80236449	NA	CMIP	N	150	31	160	79	160	116	0	0	2	11	21	24
35356	10.9	chr17:71147876-71148027	NA	RECQL5,LOC643008	N	160	41	190	99	126	75	0	3	1	5	0	4
24958	10.8	chr11:68208652-68209472	GAL	NA	P	704	264	624	1022	614	416	134	142	162	152	137	35
25427	10.8	chr11:111875456-111875928	NA	NA	N	210	106	266	156	112	115	17	13	14	72	19	44
11012	10.7	chr5:2795559-2796919	NA	NA	N	258	109	272	154	489	355	33	14	14	29	77	40
194	10.7	chr1:2817417-2817945	NA	NA	P	152	46	140	135	244	253	0	5	1	13	51	11
27539	10.7	chr12:123330512-123331059	NA	NA	N	172	56	194	132	193	159	15	7	14	69	9	43
29165	10.7	chr14:54807584-54809084	FBXO34	NA	P	500	228	360	1059	988	821	45	42	72	952	608	620
7569	10.7	chr3:53811976-53812545	NA	CACNA1D	N	134	30	86	72	329	142	0	0	0	1	3	1
25308	10.6	chr11:94479911-94481250	NA	ENDOD1	N	172	59	370	149	386	297	0	11	13	46	24	30
9933	10.5	chr4:81526399-81526900	NA	C4orf22	P	98	42	204	38	35	34	0	1	0	0	0	1
25629	10.4	chr11:124120713-124121272	NA	NRGN	P	322	70	206	191	361	388	27	6	16	130	158	76
39574	10.4	chr20:5047530-5048241	PCNA	NA	P	614	162	450	682	618	521	124	57	93	551	346	297
20790	10.3	chr9:99936747-99937610	NA	CORO2A	N	80	49	174	48	211	148	1	0	1	1	0	1
27309	10.3	chr12:115234445-115234706	NA	NA	N	70	53	120	67	126	75	0	0	0	2	0	4
9072	10.3	chr4:1019194-1019701	NA	NA	P	304	98	300	97	153	169	18	13	15	28	51	17
21536	10.2	chr9:136314735-136315212	NA	NA	N	408	111	274	280	352	288	25	31	45	160	111	179
275	10.2	chr1:5968751-5969137	NA	NPHP4	N	224	115	380	79	167	161	1	1	2	32	22	8
34155	10.2	chr17:22704513-22705746	NA	NA	P	892	280	592	1137	816	704	154	152	154	907	454	407
36210	10.2	chr18:28211725-28212186	NA	FAM59A	N	96	69	136	60	56	49	3	5	0	2	5	3
5630	10.2	chr2:144863563-144863911	NA	ZEB2	P	180	43	136	73	143	166	0	1	1	17	46	16
2854	10.1	chr1:182899601-182900335	NA	NA	P	274	136	392	148	414	303	4	34	47	91	135	88
32155	10.1	chr16:19780573-19781041	NA	GPRC5B	N	134	70	212	100	261	251	5	4	4	49	56	63
41151	10.1	chr21:46390160-46390978	NA	FTCD	P	112	59	110	63	272	212	2	5	1	21	64	49
41356	10.1	chr22:19115696-19116604	NA	SCARF2	P	512	176	208	214	542	297	57	42	33	47	245	24
22343	10	chr10:36751825-36752061	NA	NA	N	118	28	86	68	67	91	0	0	0	3	5	4
6734	10	chr2:241494150-241494864	NA	NA	N	530	404	942	395	1504	330	103	203	186	257	414	82
9109	9.9	chr4:1689765-1690135	NA	TMEM129	N	174	72	188	93	81	102	13	6	17	44	16	32
11732	9.7	chr5:78570055-78570647	NA	JMY	N	182	82	244	98	208	213	6	9	12	49	48	48
3196	9.5	chr1:213808789-213809816	KCTD3	NA	N	88	34	54	82	140	190	0	1	0	10	13	4
5957	9.5	chr2:176737285-176739927	HOXD3	NA	P	168	81	106	242	686	448	14	6	9	76	228	48
37273	9.5	chr19:5642602-5643716	RPL36	LONP1	P	996	573	1188	1180	1172	475	77	139	152	893	655	347
6681	9.5	chr2:239077428-239078071	NA	NA	N	128	43	132	119	330	127	9	0	2	38	41	19
34708	9.4	chr17:40695164-40695683	C17orf46	LOC100133991	P	306	111	300	234	464	354	10	36	28	86	84	241
42004	9.4	chr22:42816630-42817012	NA	PARVB	N	114	30	78	116	225	190	1	1	1	22	46	16
15702	9.3	chr7:1646454-1646989	NA	NA	N	618	176	606	422	413	309	58	43	50	191	101	203
40861	9.2	chr21:36299367-36299744	NA	NA	N	92	45	104	59	97	92	0	7	6	13	9	23
34783	9	chr17:43082609-43083174	KPNB1	NA	P	966	309	808	1023	749	589	185	172	217	864	456	409
29981	8.9	chr14:103261995-103262398	NA	ZFYVE21	N	60	48	78	57	98	85	0	0	1	2	4	1
32760	8.9	chr16:64903907-64904311	NA	NA	N	60	33	88	29	94	80	0	0	1	3	2	10
1473	8.8	chr1:48047919-48048803	NA	NA	N	396	31	88	207	156	89	3	2	1	10	8	4
23756	8.8	chr10:134805303-134806020	NA	NA	P	262	47	114	40	217	242	6	3	3	9	46	33
3031	8.8	chr1:202612251-202613059	NA	NA	N	112	46	144	69	29	37	1	0	0	2	0	0
5345	8.8	chr2:119323413-119324220	EN1	NA	P	282	81	214	146	357	375	44	15	34	88	182	63
16108	8.7	chr7:27153521-27154493	HOXA5,HOXA6	NA	P	1154	387	932	1272	1428	865	244	249	278	1360	852	720
4400	8.7	chr2:45085908-45086139	NA	SIX2	P	144	56	156	118	91	142	10	8	9	38	24	55
628	8.7	chr1:17862065-17862369	NA	ARHGEF10L	N	76	33	76	51	72	91	2	0	3	4	3	1
41788	8.6	chr22:36707878-36709402	SOX10	NA	P	220	141	332	162	468	483	6	23	20	12	261	5
26674	8.6	chr12:55905261-55905887	SHMT2	NXPH4	P	194	53	216	150	283	216	22	12	17	29	49	79
28029	8.6	chr13:35626817-35627451	NA	NA	P	258	71	176	188	128	185	24	22	16	89	40	45
3833	8.5	chr2:3767031-3767732	NA	NA	N	186	27	142	104	144	171	4	1	5	17	20	7
40292	8.5	chr20:49073647-49074357	KCNG1	NA	N	446	127	214	633	892	362	48	32	37	318	566	91
18083	8.4	chr8:4839344-4840339	CSMD1	NA	P	430	151	318	513	867	552	70	47	72	393	527	319
24810	8.4	chr11:65170659-65172063	NA	SIPA1	P	330	63	304	185	247	215	7	18	17	43	27	62
30292	8.4	chr15:27767441-27767557	NA	NA	N	66	37	110	29	85	83	1	4	3	3	0	8
36113	8.4	chr18:19165085-19165588	NA	C18orf45	N	84	23	368	202	100	69	0	0	1	7	0	4
41833	8.4	chr22:37794531-37794840	NA	NA	N	102	23	72	44	44	40	0	0	2	2	1	1
28013	8.3	chr13:33082591-33083046	NA	NA	N	150	35	72	144	379	144	7	4	4	31	58	52
5532	8.3	chr2:132275487-132276465	MGC50273	NA	P	2352	824	1776	2821	752	627	365	550	454	2448	430	500
5958	8.2	chr2:176744187-176744687	NA	HOXD3	P	338	64	228	134	106	152	19	19	24	16	33	41
1050	8.1	chr1:32442670-32443800	IQCC,DCDC2B	CCDC28B	P	208	89	262	83	224	252	13	20	32	43	51	38
16102	8.1	chr7:27130262-27130992	NA	NA	P	150	80	208	133	371	307	8	29	34	58	134	26
29809	8.1	chr14:99210337-99211848	NA	NA	P	130	92	396	80	341	382	8	19	26	26	179	46
33927	8.1	chr17:15797595-15797938	NA	ADORA2B	N	54	29	104	34	162	98	0	0	0	3	0	2
35960	8.1	chr18:9798873-9799494	NA	RAB31	N	360	107	272	184	305	325	11	13	36	121	146	227
36922	8.1	chr19:1353570-1353821	GAMT,DAZAP1	NA	N	136	22	152	82	246	87	1	0	1	21	42	14
37427	8.1	chr19:8484644-8485512	ZNF414	NA	P	858	249	530	1003	584	579	105	64	97	1010	347	373
38912	8.1	chr19:53528384-53528854	NA	TMEM143	N	348	93	392	264	275	163	32	16	26	74	15	91
3966	8	chr2:11432094-11432819	NA	NA	N	330	182	278	598	405	448	59	57	47	263	215	31
40570	8	chr20:61530509-61531008	NA	KCNQ2	N	146	34	172	52	137	118	0	2	4	19	29	14
15108	7.9	chr6:162020136-162021011	NA	PARK2	N	70	41	98	129	163	98	2	0	0	6	24	3
18355	7.9	chr8:23019288-23019620	NA	TNFRSF10C	N	98	35	64	93	165	119	3	1	3	14	16	26
27985	7.9	chr13:30388565-30388732	NA	C13orf33	N	148	61	132	76	176	161	0	0	2	38	73	31
11984	7.8	chr5:113352752-113353705	NA	NA	N	214	38	106	50	197	194	0	3	0	18	20	17
14260	7.8	chr6:79843762-79844502	PHIP	NA	P	498	129	426	401	203	267	78	39	73	301	80	179
17906	7.8	chr7:156490852-156491949	NA	MNX1	P	332	210	382	303	352	432	38	43	33	169	189	197
28704	7.8	chr13:112935257-112935636	NA	CUL4A	N	180	81	206	55	148	134	0	1	3	11	58	12
28846	7.7	chr14:23870417-23871673	NA	ADCY4	P	284	117	320	263	443	244	47	56	52	77	52	39
32532	7.7	chr16:46744885-46745222	NA	NA	N	126	64	178	140	123	129	12	10	8	38	42	23
33342	7.7	chr16:87840685-87841286	NA	NA	P	1598	578	1632	1368	1216	962	413	449	515	1201	715	674
4432	7.7	chr2:47021409-47022164	TTC7A	NA	P	1542	559	1254	1298	720	599	340	400	398	1256	450	476
12581	7.6	chr5:159332050-159332241	NA	ADRA1B	P	274	77	250	86	129	148	28	29	23	48	24	81
18414	7.6	chr8:26103493-26104077	NA	NA	P	260	74	236	169	181	191	13	27	21	44	39	30
30003	7.6	chr14:103680988-103681664	NA	KIF26A	N	88	45	62	59	114	76	5	0	3	19	22	7
34553	7.6	chr17:37526941-37528539	KAT2A,HSPB9	NA	P	266	190	418	305	606	507	20	40	79	272	330	320
816	7.6	chr1:24634819-24635130	NA	NPAL3	N	60	58	78	60	94	94	1	0	0	0	3	0
12503	7.5	chr5:150950549-150951229	NA	NA	N	400	121	248	266	503	389	11	9	21	229	281	290
21935	7.5	chr10:7492279-7493020	SFMBT2	NA	P	1162	525	1142	1405	775	592	300	351	376	1097	445	473
29685	7.5	chr14:91371420-91373025	TC2N	NA	P	750	204	378	959	760	861	36	30	50	909	481	505
4205	7.5	chr2:29191202-29193138	CLIP4	NA	P	526	143	300	490	544	505	45	23	45	483	312	379
18405	7.4	chr8:25953296-25954175	NA	EBF2	P	216	81	224	172	195	293	22	32	23	31	46	32
28316	7.4	chr13:75603988-75604207	NA	NA	N	180	20	66	89	118	105	0	0	4	8	15	39
31021	7.4	chr15:72212204-72214640	NA	ISLR2	P	334	101	410	153	480	424	48	46	51	72	76	84
5061	7.4	chr2:100374688-100374750	NA	NA	N	80	35	84	36	95	87	0	1	0	1	30	6
15827	7.3	chr7:5302534-5303634	NA	SLC29A4	P	286	83	284	136	257	277	40	34	32	84	32	96
18253	7.3	chr8:17314343-17315170	MTMR7	NA	P	146	26	128	185	335	238	10	2	10	87	77	110
10181	7.2	chr4:111781512-111782851	PITX2	NA	N	622	69	366	267	100	174	57	25	35	119	33	51
14429	7.2	chr6:100143134-100143359	NA	NA	P	146	37	116	78	37	57	8	2	5	10	4	8
16933	7.2	chr7:90732734-90733055	FZD1	NA	P	596	229	490	1108	860	593	104	40	111	766	560	348
19807	7.2	chr8:145720521-145721447	NA	LRRC14,LRRC24	P	148	41	76	49	125	237	0	3	5	19	19	19
29217	7.2	chr14:59000690-59000819	GPR135	NA	P	254	60	262	137	188	194	5	11	10	98	51	118
41354	7.2	chr22:19113561-19114143	NA	SCARF2	P	490	47	190	143	74	126	30	12	12	17	0	51
5949	7.2	chr2:176722541-176722813	HOXD4	NA	N	128	56	170	47	72	106	6	6	4	8	19	37
26183	7.1	chr12:25429351-25430909	NA	NA	P	500	151	302	466	291	489	89	31	59	376	153	323
27150	7.1	chr12:108648026-108648438	NA	NA	N	88	47	136	42	104	107	6	4	1	5	9	4
38476	7	chr19:44068270-44068564	NA	SIRT2	N	80	31	138	41	193	141	0	0	3	14	39	27
5133	7	chr2:105929319-105929551	NA	NA	N	46	45	96	90	148	189	0	2	0	14	33	52
5344	7	chr2:119322597-119323348	EN1	NA	P	236	86	272	101	136	189	39	32	26	49	19	48
12529	6.9	chr5:154216748-154217765	CNOT8	NA	P	506	148	430	372	327	354	77	66	103	340	76	265
16706	6.9	chr7:72811347-72811510	NA	NA	N	140	43	132	74	101	93	1	1	5	9	35	7
22724	6.9	chr10:73203803-73204739	C10orf54	NA	N	176	56	124	156	331	158	3	4	12	82	0	94
42078	6.9	chr22:44924317-44925085	PPARA	NA	P	1620	519	1320	1785	796	760	366	406	377	1589	460	604
590	6.9	chr1:16574869-16575226	NA	C1orf144	N	188	59	98	128	129	184	12	15	12	68	48	36
21532	6.8	chr9:136265853-136266407	NA	NA	N	132	90	190	54	174	256	0	5	4	22	79	26
24110	6.8	chr11:10429144-10429874	AMPD3	NA	P	296	76	240	274	277	344	17	31	26	181	98	187
301	6.8	chr1:6332978-6333550	NA	ACOT7	N	152	77	150	118	100	184	0	0	1	7	35	4
34291	6.8	chr17:28145842-28146204	NA	MYO1D	N	86	18	42	59	185	161	0	0	0	25	27	95
35976	6.8	chr18:10716266-10716806	NA	NA	P	128	44	158	106	150	109	6	6	10	59	64	54
12640	6.7	chr5:167716581-167717090	NA	WWC1	N	44	21	50	102	226	134	0	0	0	11	24	5
3228	6.7	chr1:218951261-218951635	NA	NA	N	90	59	174	91	204	163	7	6	7	19	8	29
33081	6.7	chr16:80236449-80236953	NA	CMIP	N	44	26	66	28	110	81	0	1	0	1	3	16
37038	6.7	chr19:2186440-2187176	PLEKHJ1,SF3A2	NA	P	986	311	682	1345	662	683	131	159	205	1150	420	465
681	6.7	chr1:19842861-19843875	NBL1	NA	P	2098	736	1628	1798	850	732	551	585	568	1653	559	562
1697	6.6	chr1:64185429-64185609	NA	ROR1	N	64	24	72	37	54	53	2	0	3	1	12	3
8925	6.6	chr3:196933113-196933704	MUC20	NA	N	50	23	36	164	144	33	0	0	0	6	0	2
2335	6.5	chr1:148473822-148474483	ANP32E	NA	P	3328	1115	2738	3826	1944	1120	812	977	897	2385	1251	651
24109	6.5	chr11:10296798-10297799	NA	NA	N	52	17	62	50	225	214	0	0	1	6	14	11
25401	6.5	chr11:110088974-110089552	ARHGAP20	NA	P	256	117	264	223	508	413	46	45	40	36	180	38
26176	6.5	chr12:24946164-24946605	NA	BCAT1	N	190	56	164	115	260	231	10	19	10	48	46	99
26527	6.5	chr12:50913347-50913834	KRT7	NA	P	192	56	210	77	311	305	23	13	16	96	101	224
35546	6.5	chr17:76002172-76002555	FLJ35220	NA	N	72	26	52	71	190	170	1	3	0	15	14	87
3887	6.5	chr2:8608482-8608910	NA	NA	N	196	17	60	52	79	36	0	0	0	7	0	4
1006	6.4	chr1:31097679-31098150	NA	NA	N	58	27	76	76	168	165	2	3	4	16	20	29
35062	6.4	chr17:56840247-56843173	C17orf82	TBX2	P	462	284	826	536	1824	894	103	135	178	538	531	719
17116	6.3	chr7:100310394-100311147	ARS2	NA	P	1076	374	852	708	263	317	193	217	182	444	130	237
29677	6.3	chr14:90913731-90914036	NA	CCDC88C	N	124	57	200	83	133	84	9	7	25	30	24	40
33711	6.3	chr17:7151313-7152186	EIF5A	NA	P	856	307	732	458	457	590	161	168	221	463	228	351
37585	6.3	chr19:12134514-12135297	ZNF136	NA	P	1768	641	1366	2044	1007	650	377	408	363	1624	684	453
1847	6.2	chr1:86740879-86741343	NA	NA	N	260	52	178	82	58	98	11	8	11	22	15	20
26630	6.2	chr12:54687118-54688270	NA	NA	P	582	217	530	710	702	691	130	145	134	740	447	523
28698	6.2	chr13:112832244-112832983	NA	F10	P	240	100	280	98	217	158	36	45	36	66	75	70
37821	6.2	chr19:16543692-16544752	SLC35E1	NA	P	562	218	466	495	338	383	116	104	135	494	174	205
9597	6.2	chr4:40327248-40327807	NA	NA	P	82	27	52	52	186	153	5	0	3	6	3	23
23345	6.1	chr10:112835511-112835857	NA	NA	N	114	22	36	31	52	58	0	2	0	4	3	0
243	6.1	chr1:3799311-3799466	NA	C1orf174	N	52	26	72	44	102	116	0	2	3	15	39	27
25630	6.1	chr11:124121272-124121740	NA	NRGN	P	250	49	214	167	274	333	23	16	17	86	72	164
282	6.1	chr1:6084219-6085204	NA	CHD5	N	132	86	230	162	122	143	17	22	20	97	48	67
28604	6.1	chr13:109906251-109906578	NA	COL4A2	N	90	31	58	80	78	101	5	6	3	21	20	32
34333	6.1	chr17:30811520-30812352	NA	NA	P	328	120	334	171	303	259	42	51	40	141	107	170
38264	6.1	chr19:40324953-40326077	FXYD7	FXYD1	P	502	149	372	215	466	377	45	49	64	188	147	266
23987	6	chr11:2905487-2906713	PHLDA2	NA	P	1016	379	1078	727	573	382	242	289	255	518	113	283
13894	6	chr6:38764421-38764788	NA	GLO1	N	92	24	48	73	186	82	0	3	1	8	0	12
17458	6	chr7:130442026-130442676	FLJ43663	NA	P	2188	845	1938	2799	591	515	454	531	488	1203	377	292
25674	6	chr11:125839944-125841901	NA	KIRREL3	N	1078	229	956	897	675	570	119	157	95	167	95	87
36186	6	chr18:26653225-26653712	NA	NA	N	48	24	42	36	116	106	0	0	0	13	36	19
39535	6	chr20:3680720-3680958	NA	HSPA12B	P	230	68	254	138	268	278	9	9	21	83	82	205
39594	6	chr20:5970632-5971425	NA	LRRN4	P	146	50	108	27	29	49	0	0	0	1	3	0
41513	6	chr22:24290344-24291007	ADRBK2	NA	P	974	316	598	1065	924	542	143	200	166	976	626	450
5528	6	chr2:132122176-132122286	NA	NA	N	104	24	108	78	120	88	1	3	2	13	4	15
18601	5.9	chr8:38951314-38951606	HTRA4	NA	P	284	53	206	72	57	95	8	19	9	14	7	27
23952	5.9	chr11:2163452-2164164	NA	NA	N	204	136	232	378	573	294	35	48	48	263	212	124
24106	5.9	chr11:10280641-10281743	ADM	NA	P	1214	369	744	1483	707	730	136	96	172	993	464	420
30772	5.9	chr15:60423924-60425067	NA	NA	N	396	102	282	213	520	516	59	41	51	188	231	192
11014	5.8	chr5:2802869-2803712	IRX2,C5orf38	NA	P	138	54	218	114	403	327	19	13	12	44	60	37
18808	5.8	chr8:58068696-58069552	IMPAD1	NA	P	728	217	422	1197	938	656	133	84	104	1347	640	462
231	5.8	chr1:3556421-3556800	WDR8	NA	P	404	164	372	383	398	323	86	73	89	347	239	220
31720	5.8	chr16:1600314-1601632	IFT140,CRAMP1L	NA	P	1010	361	902	1487	950	835	221	195	301	1380	541	533
32962	5.8	chr16:71654369-71655140	NA	NA	P	396	150	220	265	554	337	75	77	52	104	262	97
33814	5.8	chr17:8846102-8846715	NA	NA	N	288	76	220	211	385	260	24	35	35	140	80	172
27279	5.7	chr12:113367179-113367615	NA	NA	N	158	61	164	74	117	154	21	25	7	36	46	50
39725	5.7	chr20:20298798-20299619	NA	INSM1	N	122	37	124	138	209	245	9	4	9	110	45	93
6347	5.7	chr2:219590602-219590702	NA	CCDC108	N	58	38	66	47	100	88	3	3	1	22	27	42
17890	5.6	chr7:156063287-156063578	NA	NA	N	36	21	70	38	114	73	0	1	1	11	0	8
21094	5.6	chr9:123928413-123929643	NA	NA	P	1514	527	1354	1735	1192	907	359	391	469	2042	838	522
26439	5.6	chr12:48011732-48013307	NA	C1QL4	P	152	118	364	277	428	431	23	27	27	94	86	49
27470	5.6	chr12:120942940-120943915	BCL7A	NA	N	164	25	170	83	242	212	10	4	8	11	14	21
31665	5.6	chr16:1055312-1056348	NA	NA	P	188	48	66	117	151	72	9	12	7	9	63	4
8057	5.6	chr3:124122894-124123795	NA	SEMA5B	P	86	18	68	16	254	234	3	0	2	19	54	133
15148	5.5	chr6:166138606-166139288	NA	NA	P	318	101	250	325	340	356	44	55	51	102	170	79
17953	5.5	chr7:157493741-157494116	NA	PTPRN2	N	144	14	68	42	126	119	0	0	0	2	31	17
23621	5.5	chr10:129594632-129596345	PTPRE	NA	P	832	274	510	394	316	386	125	155	156	308	127	260
26088	5.5	chr12:12934152-12934817	GPRC5A	NA	N	588	276	554	559	715	507	80	122	172	239	228	201
28328	5.5	chr13:76798795-76799246	MYCBP2	NA	P	908	358	848	677	638	471	244	269	245	692	318	340
31648	5.5	chr16:716563-717510	CCDC78,HAGHL	NA	P	1570	576	1496	1856	1447	874	400	479	533	2104	789	735
38627	5.5	chr19:47498062-47499532	PRR19,PAFAH1B3	NA	P	184	49	250	80	189	114	3	10	12	53	28	39
457	5.5	chr1:10994179-10995964	TARDBP	NA	P	1586	657	1130	2772	993	768	330	446	394	2069	494	646
15071	5.4	chr6:159574925-159575444	NA	FNDC1	P	182	77	254	123	512	247	31	29	21	35	173	17
18361	5.4	chr8:23201386-23202099	R3HCC1	NA	P	726	243	542	702	801	611	98	84	115	774	543	274
22812	5.4	chr10:76834619-76835728	ZNF503,C10orf41	NA	P	262	62	252	193	197	251	32	27	46	79	74	35
24415	5.4	chr11:44289539-44290159	ALX4	NA	N	168	39	120	44	34	64	11	5	2	16	6	14
3919	5.4	chr2:9811208-9811675	NA	NA	N	702	28	360	513	32	44	9	6	3	34	1	1
7554	5.4	chr3:53169607-53171621	PRKCD	NA	P	1160	386	890	1107	964	868	190	202	253	1256	582	781
9439	5.4	chr4:20594839-20595694	NA	KCNIP4	N	668	236	460	730	908	778	100	84	138	715	589	648
16118	5.3	chr7:27180464-27181657	HOXA10	NA	P	288	70	246	111	246	209	25	33	25	30	14	44
22814	5.3	chr10:76838726-76839349	NA	C10orf41	P	940	338	670	1269	1076	698	218	197	218	1161	688	524
28828	5.3	chr14:23121789-23122217	JPH4	NA	N	34	17	50	41	63	63	0	1	0	4	9	10
31513	5.3	chr15:99075884-99075988	NA	NA	N	44	31	40	23	121	31	0	0	0	6	23	5
38216	5.3	chr19:38953046-38953116	NA	CHST8	N	38	21	40	31	48	36	0	0	1	4	6	11
4389	5.3	chr2:45015217-45015943	NA	NA	P	312	102	208	553	653	492	53	23	50	536	410	294
20884	5.2	chr9:109289287-109290343	KLF4	NA	P	788	264	478	394	185	232	112	100	133	171	96	89
40112	5.2	chr20:41977896-41979296	TOX2	NA	P	692	240	538	390	353	422	122	139	169	401	120	326
13842	5.2	chr6:36211251-36211496	NA	MAPK13	N	674	230	478	603	226	258	3	3	8	50	124	19
21949	5.2	chr10:8133149-8134497	FLJ45983,GATA3	NA	P	404	150	428	460	910	657	76	94	128	444	285	221
22718	5.2	chr10:72777862-72778268	NA	SLC29A3	N	138	13	38	28	20	16	0	0	0	0	0	0
25141	5.2	chr11:75710554-75711079	NA	NA	P	302	77	242	144	112	199	18	30	60	110	49	109
2519	5.2	chr1:154605664-154606270	RHBG	NA	P	382	124	364	166	243	312	60	75	86	131	78	167
31697	5.2	chr16:1353596-1353700	NA	UNKL	N	146	33	150	62	147	120	8	9	12	28	28	54
38945	5.2	chr19:53929755-53930397	NA	RASIP1	P	588	130	508	560	332	354	44	48	59	390	198	255
40391	5.2	chr20:55949778-55950277	NA	NA	N	158	13	108	45	31	49	1	0	1	1	1	0
41086	5.2	chr21:44926171-44926464	KRTAP12-1	C21orf29	N	168	19	138	56	108	79	10	2	5	26	14	41
13372	5.1	chr6:16326471-16327447	NA	NA	N	40	103	150	108	128	45	1	1	3	12	32	2
17363	5.1	chr7:124192354-124193615	GPR37	NA	P	1192	564	1246	1501	1634	1299	191	298	357	1783	827	1105
21750	5.1	chr9:139493404-139494003	NA	PNPLA7	N	112	67	204	154	297	110	15	17	30	40	67	29
26696	5.1	chr12:56418493-56419401	AGAP2	NA	P	882	286	708	962	683	525	131	118	183	1023	414	449
3235	5.1	chr1:219124357-219124718	NA	HLX	P	190	16	288	95	183	172	2	1	1	16	17	7
7520	5.1	chr3:52230339-52230870	NA	TLR9	P	60	21	108	29	92	68	0	3	0	1	0	2
22528	5	chr10:54314129-54315638	NA	NA	N	198	65	90	96	152	274	22	5	8	65	76	113
30999	5	chr15:71130688-71133142	NEO1	NA	P	282	99	138	260	306	363	22	15	24	251	165	268
3236	5	chr1:219126993-219128912	NA	NA	P	164	68	172	231	593	465	21	33	29	170	369	123
5734	5	chr2:159281746-159282094	NA	NA	N	58	19	94	50	111	124	4	1	2	9	36	13
7417	5	chr3:49017577-49017971	WDR6	PH-4	N	100	62	244	116	86	20	2	0	0	1	6	3

## Sheet: CD24.body.Met
Gene symbol	RefSeq IDs	Approved Name	Chromosome
ACHE	NM_015831	acetylcholinesterase (Yt blood group)	7q22
AGRN	NM_198576	agrin	1p36.33
AKT1	NM_005163	v-akt murine thymoma viral oncogene homolog 1	14q32.32-q32.33
APC2	NM_005883	adenomatosis polyposis coli 2	19p13.3
ATP2A3	NM_174956	ATPase, Ca++ transporting, ubiquitous	17p13.3
ATPBD3	NM_145232	NA	NA
ATXN7	NM_001128149	ataxin 7	3p21.1-p12
B3GNT3	NM_014256	UDP-GlcNAc:betaGal beta-1,3-N-acetylglucosaminyltransferase 3	19p13.1
BCL3	NM_005178	B-cell CLL/lymphoma 3	19q13.1-q13.2
C11orf35	NM_173573	chromosome 11 open reading frame 35	11
C19orf25	NM_152482	chromosome 19 open reading frame 25	19p13.3
C1QL1	NM_006688	complement component 1, q subcomponent-like 1	17q21
C1orf113	NM_024676	chromosome 1 open reading frame 113	1p34.3
CASZ1	NM_001079843	castor zinc finger 1	1p36.22
CD6	NM_006725	CD6 molecule	11q12.2
CHKB	NM_152253	choline kinase beta	22q13.33
COL9A2	NM_001852	collagen, type IX, alpha 2	1p33-p32
CRIP2	NM_001312	cysteine-rich protein 2	14q32.3
DNM2	NM_004945	dynamin 2	19p
DOT1L	NM_032482	DOT1-like, histone H3 methyltransferase (S. cerevisiae)	19p13.3
ELK3	NM_005230	ELK3, ETS-domain protein (SRF accessory protein 2)	12q23
EPB49	NM_001114137	erythrocyte membrane protein band 4.9 (dematin)	8p21.1
EPS8L1	NM_133180	EPS8-like 1	19q13.42
FAM176B	NM_018166	family with sequence similarity 176, member B	1p34.3
FLJ37453	NR_024279	NA	NA
FOXP4	NM_001012427	forkhead box P4	6p21.1
GARNL4	NM_015085	NA	NA
GNG7	NM_052847	guanine nucleotide binding protein (G protein), gamma 7	19p13.3
GRAMD4	NM_015124	GRAM domain containing 4	22q13.31
HCN4	NM_005477	hyperpolarization activated cyclic nucleotide-gated potassium channel 4	15q24.1
HOXC4	NM_014620	homeobox C4	12q13.13
HOXC5	NR_003084	homeobox C5	12q13.13
HOXC6	NM_153693	homeobox C6	12q13.13
INPP5A	NM_005539	inositol polyphosphate-5-phosphatase, 40kDa	10q26.3
IRX4	NM_016358	iroquois homeobox 4	5p15.33
KCNAB2	NM_003636	potassium voltage-gated channel, shaker-related subfamily, beta member 2	1p36.3
KCNN3	NM_170782	potassium intermediate/small conductance calcium-activated channel, subfamily N, member 3	1q21.3
KCNQ1	NM_000218	potassium voltage-gated channel, KQT-like subfamily, member 1	11p15.5
KCNQ4	NM_172163	potassium voltage-gated channel, KQT-like subfamily, member 4	1p34
KIF1A	NM_004321	kinesin family member 1A	2q37.2
KLF16	NM_031918	Kruppel-like factor 16	19p13.3
LMX1B	NM_002316	LIM homeobox transcription factor 1, beta	9q33.3
LOC541471	NR_015395	NA	NA
LPAR5	NM_020400	lysophosphatidic acid receptor 5	12p13.31
MAGI1	NM_001033057	membrane associated guanylate kinase, WW and PDZ domain containing 1	3p14.1
MAPRE2	NM_014268	microtubule-associated protein, RP/EB family, member 2	18q12.1
MCF2L	NM_001112732	MCF.2 cell line derived transforming sequence-like	13q34
MEIS1	NM_002398	Meis homeobox 1	2p14
MKL1	NM_020831	megakaryoblastic leukemia (translocation) 1	22q13
NCRNA00152	NR_024204	non-protein coding RNA 152	2p11.2
NFIC	NM_205843	nuclear factor I/C (CCAAT-binding transcription factor)	19p13.3
PDXDC1	NM_015027	pyridoxal-dependent decarboxylase domain containing 1	16p13.11
PDXDC2	NR_003610	pyridoxal-dependent decarboxylase domain containing 2	16q22.1
PLB1	NM_153021	phospholipase B1	2p23.3
PPP1R13L	NM_006663	protein phosphatase 1, regulatory (inhibitor) subunit 13 like	19q13.32
PRKCZ	NM_002744	protein kinase C, zeta	1p36.33-p36.2
PRR5	NM_001017528	proline rich 5 (renal)	22q13.3
PRSS27	NM_031948	protease, serine 27	16p13.3
PSMD14	NM_005805	proteasome (prosome, macropain) 26S subunit, non-ATPase, 14	2q14.3
PTPRF	NM_002840	protein tyrosine phosphatase, receptor type, F	1p34
RAI1	NM_030665	retinoic acid induced 1	17p11.2
RAMP1	NM_005855	receptor (G protein-coupled) activity modifying protein 1	2q36-q37.1
RBPJL	NM_014276	recombination signal binding protein for immunoglobulin kappa J region-like	20q12-q13.1
RCSD1	NM_052862	RCSD domain containing 1	1q24.2
RFX1	NM_002918	regulatory factor X, 1 (influences HLA class II expression)	19p13.1
RHBDL3	NM_138328	rhomboid, veinlet-like 3 (Drosophila)	17q11.2
RORB	NM_006914	RAR-related orphan receptor B	9q22
SERPINH1	NM_001235	serpin peptidase inhibitor, clade H (heat shock protein 47), member 1, (collagen binding protein 1)	11q13.5
SH3RF2	NM_152550	SH3 domain containing ring finger 2	5q32
SLC22A18	NM_183233	solute carrier family 22, member 18	11p15.5
SLC9A3R2	NM_004785	solute carrier family 9 (sodium/hydrogen exchanger), member 3 regulator 2	16p13.3
TAOK3	NM_016281	TAO kinase 3	12q
TELO2	NM_016111	TEL2, telomere maintenance 2, homolog (S. cerevisiae)	16p13.3
TMPRSS9	NM_182973	transmembrane protease, serine 9	19p13.3
TNK1	NM_003985	tyrosine kinase, non-receptor, 1	17p13.1
TTC38	NM_017931	tetratricopeptide repeat domain 38	22q13
USP4	NM_003363	ubiquitin specific peptidase 4 (proto-oncogene)	3p21.3
VWA1	NM_022834	von Willebrand factor A domain containing 1	1p36.33
WNT6	NM_006522	wingless-type MMTV integration site family, member 6	2q35
ZFYVE28	NM_020972	zinc finger, FYVE domain containing 28	4p16.3
ZNF467	NM_207336	zinc finger protein 467	7q36.1
ZNF771	NM_016643	zinc finger protein 771	16p11.2

## Sheet: CD24.prom.Met
Gene symbol	RefSeq IDs	Approved Name	Chromosome
ACVRL1	NM_000020	activin A receptor type II-like 1	12q11-q14
C9orf106	NM_001012715	chromosome 9 open reading frame 106	9q34.11
CCR10	NM_016602	chemokine (C-C motif) receptor 10	17q21.1-q21.3
CKLF	NM_001040138	chemokine-like factor	16q22.1-q22.3
CLDN15	NM_014343	claudin 15	7q22
CLDN6	NM_021195	claudin 6	16p13.3
CNTNAP1	NM_003632	contactin associated protein 1	17q21
COL1A2	NM_000089	collagen, type I, alpha 2	7q21.3
COL21A1	NM_030820	collagen, type XXI, alpha 1	6p12.3-p11.2
CPAMD8	NM_015692	C3 and PZP-like, alpha-2-macroglobulin domain containing 8	19p13.12
DTX1	NM_004416	deltex homolog 1 (Drosophila)	12q24
FAM18A	NM_001079512	family with sequence similarity 18, member A	16p13.3
FOXI2	NM_207426	forkhead box I2	10q26.2
FXYD1	NM_021902	FXYD domain containing ion transport regulator 1	19q13.1
FXYD7	NM_022006	FXYD domain containing ion transport regulator 7	19q13.1
FZD5	NM_003468	frizzled homolog 5 (Drosophila)	2q33-q34
G0S2	NM_015714	G0/G1switch 2	1q32.2-q41
GPR123	NM_001083909	G protein-coupled receptor 123	10q26
GRIK2	NM_021956	glutamate receptor, ionotropic, kainate 2	6q16.3-q21
HIC1	NM_006497	hypermethylated in cancer 1	17p13.3
ITGA5	NM_002205	integrin, alpha 5 (fibronectin receptor, alpha polypeptide)	12q11-q13
ITPRIPL2	NM_001034841	inositol 1,4,5-triphosphate receptor interacting protein-like 2	16p12.3
LAG3	NM_002286	lymphocyte-activation gene 3	12p13.3
LGI4	NM_139284	leucine-rich repeat LGI family, member 4	19q13.13
LOC100133991	NR_024434	NA	NA
MYOM1	NM_003803	myomesin 1, 185kDa	18p11.31
NHLRC1	NM_198586	NHL repeat containing 1	6p22.3
PLEKHH3	NM_024927	pleckstrin homology domain containing, family H (with MyTH4 domain) member 3	17q21.2
REXO1	NM_020695	REX1, RNA exonuclease 1 homolog (S. cerevisiae)	19p13.3
SCO2	NM_005138	SCO cytochrome oxidase deficient homolog 2 (yeast)	22q13.33
SLFN12	NM_018042	schlafen family member 12	17q12
SPARC	NM_003118	secreted protein, acidic, cysteine-rich (osteonectin)	5q31-q33
TCTN1	NM_024549	tectonic family member 1	12q24.11
TET1	NM_030625	tet oncogene 1	10q21
TK2	NM_004614	thymidine kinase 2, mitochondrial	16q22-q23.1
TNFRSF12A	NM_016639	tumor necrosis factor receptor superfamily, member 12A	16p13.3
TULP3	NM_003324	tubby like protein 3	12p13
TUSC5	NM_172367	tumor suppressor candidate 5	17p13.3
TYMP	NM_001113756	thymidine phosphorylase	22q13
UFSP1	NM_001015072	UFM1-specific peptidase 1 (non-functional)	7q22.1
ZNF496	NM_032752	zinc finger protein 496	1q44
ZNF600	NM_198457	zinc finger protein 600	19q13.42

## Sheet: CD44.body.Met
Gene symbol	RefSeq IDs	Approved Name	Chromosome
ACOT7	NM_181866	acyl-CoA thioesterase 7	1p36
ACSF2	NM_025149	acyl-CoA synthetase family member 2	17q21.33
ADAM33	NM_025220	ADAM metallopeptidase domain 33	20p13
ADCY4	NM_139247	adenylate cyclase 4	14q11.2
ADORA2B	NM_000676	adenosine A2b receptor	17p12-p11.2
ADRA1B	NM_000679	adrenergic, alpha-1B-, receptor	5q23-q32
ARHGEF10L	NM_018125	Rho guanine nucleotide exchange factor (GEF) 10-like	1p36.13
BCAT1	NM_005504	branched chain aminotransferase 1, cytosolic	12pter-q12
C10orf41	NR_024422	chromosome 10 open reading frame 41	10q22.3
C11orf66	NM_145017	chromosome 11 open reading frame 66	11q12.2
C13orf33	NM_032849	chromosome 13 open reading frame 33	13q12.3
C18orf45	NM_032933	chromosome 18 open reading frame 45	18q11.2
C1QL4	NM_001008223	complement component 1, q subcomponent-like 4	12q13.12
C1orf144	NM_001114600	chromosome 1 open reading frame 144	1p36.13
C1orf174	NM_207356	chromosome 1 open reading frame 174	1p36.32
C20orf117	NM_199181	chromosome 20 open reading frame 117	20q11.23
C21orf29	NM_144991	chromosome 21 open reading frame 29	21q22.3
CACNA1D	NM_000720	calcium channel, voltage-dependent, L type, alpha 1D subunit	3p14.3
CCDC108	NM_194302	coiled-coil domain containing 108	2q35
CCDC88C	NM_001080414	coiled-coil domain containing 88C	14q32.12
CDC42BPB	NM_006035	CDC42 binding protein kinase beta (DMPK-like)	14q32.3
CHD5	NM_015557	chromodomain helicase DNA binding protein 5	1p36.3
CHST8	NM_001127895	carbohydrate (N-acetylgalactosamine 4-0) sulfotransferase 8	19q13.1
CMIP	NM_198390	NA	NA
CNNM4	NM_020184	cyclin M4	2q11.2
COL4A2	NM_001846	collagen, type IV, alpha 2	13q34
COL5A1	NM_000093	collagen, type V, alpha 1	9q34.2-q34.3
COLEC12	NM_130386	collectin sub-family member 12	18pter-p11.3
CORO2A	NM_052820	coronin, actin binding protein, 2A	9q22.3
CUL4A	NM_003589	cullin 4A	13q34
DCHS1	NM_003737	dachsous 1 (Drosophila)	11p15.4
DNM1	NM_004408	dynamin 1	9q34
EBF2	NM_022659	early B-cell factor 2	8p21.1
ENDOD1	NM_015036	endonuclease domain containing 1	11q21
F10	NM_000504	coagulation factor X	13q34
FAM19A5	NM_001082967	family with sequence similarity 19 (chemokine (C-C motif)-like), member A5	22q13.32
FAM59A	NM_022751	family with sequence similarity 59, member A	18q12.1
FMNL1	NM_005892	formin-like 1	17q21.31
FNDC1	NM_032532	fibronectin type III domain containing 1	6q25
FTCD	NM_006657	formiminotransferase cyclodeaminase	21q22.3
FXYD1	NM_021902	FXYD domain containing ion transport regulator 1	19q13.1
GLO1	NM_006708	glyoxalase I	6p21.3-p21.1
GPR124	NM_032777	G protein-coupled receptor 124	8p11.22
GPRC5B	NM_016235	G protein-coupled receptor, family C, group 5, member B	16p12
GPT	NM_005309	glutamic-pyruvate transaminase (alanine aminotransferase)	8q24.2-qter
HHIPL1	NM_032425	HHIP-like 1	14q32
HLX	NM_021958	H2.0-like homeobox	1q41
HOXD3	NM_006898	homeobox D3	2q31.1
HSPA12B	NM_052970	heat shock 70kD protein 12B	20p13
INSM1	NM_002196	insulinoma-associated 1	20p11.2
ISLR2	NM_001130136	immunoglobulin superfamily containing leucine-rich repeat 2	15q24.1
JMY	NM_152405	junction mediating and regulatory protein, p53 cofactor	5q14.1
KCNIP4	NM_001035003	Kv channel interacting protein 4	4p15.32
KCNQ1	NM_000218	potassium voltage-gated channel, KQT-like subfamily, member 1	11p15.5
KCNQ2	NM_172107	potassium voltage-gated channel, KQT-like subfamily, member 2	20q13.33
KIAA1522	NM_020888	KIAA1522	1p35.1
KIAA1688	NM_025251	NA	NA
KIF26A	NM_015656	kinesin family member 26A	14q32.33
KLF5	NM_001730	Kruppel-like factor 5 (intestinal)	13q21.3
KRT19	NM_002276	keratin 19	17q21-q23
LOC100133991	NR_024434	NA	NA
LOC643008	NR_024379	NA	NA
LONP1	NM_004793	lon peptidase 1, mitochondrial	19p13.2
LRRC14	NM_014665	leucine rich repeat containing 14	8q24.3
LRRC24	NM_001024678	leucine rich repeat containing 24	8q24.3
LRRN4	NM_152611	leucine rich repeat neuronal 4	20p12.3
MAPK13	NM_002754	mitogen-activated protein kinase 13	6p21
MFSD7	NM_032219	major facilitator superfamily domain containing 7	4p16.3
MUC4	NM_004532	mucin 4, cell surface associated	3q29
MYL5	NM_002477	myosin, light chain 5, regulatory	4p16
MYO1D	NM_015194	myosin ID	17q11-q12
NPAL3	NM_020448	NA	NA
NPHP4	NM_015102	nephronophthisis 4	1p36
NRGN	NM_001126181	neurogranin (protein kinase C substrate, RC3)	11q24
NXPH4	NM_007224	neurexophilin 4	12q13
OAZ1	NM_004152	ornithine decarboxylase antizyme 1	19p13.3
OPA3	NM_001017989	optic atrophy 3 (autosomal recessive, with chorea and spastic paraplegia)	19q13.2-q13.3
PACS2	NM_015197	phosphofurin acidic cluster sorting protein 2	14q32
PARK2	NM_004562	Parkinson disease (autosomal recessive, juvenile) 2, parkin	6q25.2-q27
PARVB	NM_013327	parvin, beta	22q13.2-q13.33
PEAR1	NM_001080471	platelet endothelial aggregation receptor 1	1q23.1
PIP5K1C	NM_012398	phosphatidylinositol-4-phosphate 5-kinase, type I, gamma	19p13.3
PNPLA2	NM_020376	patatin-like phospholipase domain containing 2	11p15.5
PNPLA7	NM_152286	patatin-like phospholipase domain containing 7	9q34.3
PTPRN2	NM_130843	protein tyrosine phosphatase, receptor type, N polypeptide 2	7q36
RAB31	NM_006868	RAB31, member RAS oncogene family	18p11.3
RASIP1	NM_017805	Ras interacting protein 1	19q13.33
RECQL5	NM_004259	RecQ protein-like 5	17q25
ROR1	NM_001083592	receptor tyrosine kinase-like orphan receptor 1	1p32-p31
RSRC1	NM_016625	arginine/serine-rich coiled-coil 1	3q25.32
SAC3D1	NM_013299	SAC3 domain containing 1	11q13.1
SCARF2	NM_153334	scavenger receptor class F, member 2	22q11.21
SEMA5B	NM_001031702	sema domain, seven thrombospondin repeats (type 1 and type 1-like), transmembrane domain (TM) and short cytoplasmic domain, (semaphorin) 5B	3q21.1
SHANK1	NM_016148	SH3 and multiple ankyrin repeat domains 1	19q13.3
SIM1	NM_005068	single-minded homolog 1 (Drosophila)	6q16.3-q21
SIPA1	NM_153253	signal-induced proliferation-associated 1	11q13.3
SIRT2	NM_030593	sirtuin (silent mating type information regulation 2 homolog) 2 (S. cerevisiae)	19q13
SIX2	NM_016932	SIX homeobox 2	2p21
SLC29A3	NM_018344	solute carrier family 29 (nucleoside transporters), member 3	10q22.2
SLC29A4	NM_001040661	solute carrier family 29 (nucleoside transporters), member 4	7p22.2
SLC2A11	NM_001024938	solute carrier family 2 (facilitated glucose transporter), member 11	22q11.2
SLC9A3R1	NM_004252	solute carrier family 9 (sodium/hydrogen exchanger), member 3 regulator 1	17q25.1
SOX9	NM_000346	SRY (sex determining region Y)-box 9	17q23
TBC1D24	NM_020705	TBC1 domain family, member 24	16p13.3
TBX2	NM_005994	T-box 2	17q23
TLR9	NM_017442	toll-like receptor 9	3p21.3
TMEM129	NM_001127266	transmembrane protein 129	4p16.3
TMEM143	NM_018273	transmembrane protein 143	19q13.32
TNFRSF10C	NM_003841	tumor necrosis factor receptor superfamily, member 10c, decoy without an intracellular domain	8p22-p21
TRAF3IP2	NM_147200	TRAF3 interacting protein 2	6q21
TRAM2	NM_012288	translocation associated membrane protein 2	6p21.1-p12
UNKL	NM_023076	unkempt homolog (Drosophila)-like	16p13.3
WIPF3	NM_001080529	WAS/WASL interacting protein family, member 3	7p15.1
WWC1	NM_015238	WW and C2 domain containing 1	5q34
ZEB2	NM_014795	zinc finger E-box binding homeobox 2	2q22.3
ZFYVE21	NM_024071	zinc finger, FYVE domain containing 21	14q32.33
ZMYND10	NM_015896	zinc finger, MYND-type containing 10	3p21.3

## Sheet: CD44.prom.Met
Gene symbol	RefSeq IDs	Approved Name	Chromosome
ADM	NM_001124	adrenomedullin	11
ADRBK2	NM_005160	adrenergic, beta, receptor kinase 2	22q11
AGAP2	NM_001122772	ArfGAP with GTPase domain, ankyrin repeat and PH domain 2	12q13.2
AMPD3	NM_001025389	adenosine monophosphate deaminase (isoform E)	11p15
ANP32E	NM_001136479	acidic (leucine-rich) nuclear phosphoprotein 32 family, member E	1q22
ARHGAP20	NM_020809	Rho GTPase activating protein 20	11q23.2
ARS2	NM_001128852	NA	NA
BCL7A	NM_001024808	B-cell CLL/lymphoma 7A	12q24.1
C10orf41	NR_024422	chromosome 10 open reading frame 41	10q22.3
C10orf54	NM_022153	chromosome 10 open reading frame 54	10
C15orf39	NM_015492	chromosome 15 open reading frame 39	15q23
C17orf46	NM_152343	chromosome 17 open reading frame 46	17q21.31
C5orf38	NM_178569	chromosome 5 open reading frame 38	5p15.33
CCDC106	NM_013301	coiled-coil domain containing 106	19q13.42
CCDC78	NM_001031737	coiled-coil domain containing 78	16p13.3
CHAD	NM_001267	chondroadherin	17q21.33
CLIP4	NM_024692	CAP-GLY domain containing linker protein family, member 4	2p23
CNOT8	NM_004779	CCR4-NOT transcription complex, subunit 8	5q31-q33
CRAMP1L	NM_020825	Crm, cramped-like (Drosophila)	16p13.3
CSMD1	NM_033225	CUB and Sushi multiple domains 1	8p23.2
DAZAP1	NM_018959	DAZ associated protein 1	19p13.3
DCDC2B	NM_001099434	doublecortin domain containing 2B	1p35.1
EBF3	NM_001005463	early B-cell factor 3	10q26.3
EDN1	NM_001955	endothelin 1	6p24.1
EDN2	NM_001956	endothelin 2	1p34
EFCAB4A	NM_173584	EF-hand calcium binding domain 4A	11p15.5
EIF5A	NM_001970	eukaryotic translation initiation factor 5A	17p13-p12
EN1	NM_001426	engrailed homeobox 1	2q14.2
FBXO34	NM_152231	F-box protein 34	14q22.1
FLJ35220	NM_173627	NA	NA
FLJ42709	NR_015369	NA	NA
FLJ43663	NR_024153	NA	NA
FLJ45983	NR_024255	NA	NA
FXYD7	NM_022006	FXYD domain containing ion transport regulator 7	19q13.1
FZD1	NM_003505	frizzled homolog 1 (Drosophila)	7q21
GAL	NM_015973	galanin prepropeptide	11q13.2
GAMT	NM_000156	guanidinoacetate N-methyltransferase	19p13.3
GATA3	NM_002051	GATA binding protein 3	10p15
GBX1	NM_001098834	gastrulation brain homeobox 1	7q36.1
GPR135	NM_022571	G protein-coupled receptor 135	14q23.1
GPR37	NM_005302	G protein-coupled receptor 37 (endothelin receptor type B-like)	7q31
GPRC5A	NM_003979	G protein-coupled receptor, family C, group 5, member A	12p13-p12.3
HAGHL	NM_207112	hydroxyacylglutathione hydrolase-like	16p13.3
HOXA10	NM_018951	homeobox A10	7p15.2
HOXA5	NM_019102	homeobox A5	7p15.2
HOXA6	NM_024014	homeobox A6	7p15.2
HOXA7	NM_006896	homeobox A7	7p15.2
HOXD3	NM_006898	homeobox D3	2q31.1
HOXD4	NM_014621	homeobox D4	2q31.1
HSPB9	NM_033194	heat shock protein, alpha-crystallin-related, B9	17q21
HTRA4	NM_153692	HtrA serine peptidase 4	8p11.23
IFT140	NM_014714	intraflagellar transport 140 homolog (Chlamydomonas)	16p13.3
IL1RL2	NM_003854	interleukin 1 receptor-like 2	2q12
IMPAD1	NM_017813	inositol monophosphatase domain containing 1	8q12.1
IQCC	NM_018134	IQ motif containing C	1p36.11-p34.2
IRX2	NM_001134222	iroquois homeobox 2	5p15.33
KAT2A	NM_021078	K(lysine) acetyltransferase 2A	17q12-q21
KCNG1	NM_002237	potassium voltage-gated channel, subfamily G, member 1	20q13
KCTD3	NM_016121	potassium channel tetramerisation domain containing 3	1q41
KLF4	NM_004235	Kruppel-like factor 4 (gut)	9q31
KPNB1	NM_002265	karyopherin (importin) beta 1	17q21.32
KRT15	NM_002275	keratin 15	17q21-q23
KRT7	NM_005556	keratin 7	12q12-q21
KY	NM_178554	kyphoscoliosis peptidase	3q22.1
LOC642587	NM_001104548	NA	NA
MFSD3	NM_138431	major facilitator superfamily domain containing 3	8q24.3
MTMR7	NM_004686	myotubularin related protein 7	8p22
MUC20	NM_152673	mucin 20, cell surface associated	3q29
MYCBP2	NM_015057	MYC binding protein 2	13q22
NBL1	NM_005380	neuroblastoma, suppression of tumorigenicity 1	1p36.3-p36.2
NEO1	NM_002499	neogenin homolog 1 (chicken)	15q22.3-q23
NOS1	NM_000620	nitric oxide synthase 1 (neuronal)	12q14-qter
PCNA	NM_182649	proliferating cell nuclear antigen	20pter-p12
PHIP	NM_017934	pleckstrin homology domain interacting protein	6q14
PHLDA2	NM_003311	pleckstrin homology-like domain, family A, member 2	11p15.4
PITX2	NM_153427	paired-like homeodomain 2	4q25
PLEKHJ1	NM_018049	pleckstrin homology domain containing, family J member 1	19p13.3
PPARA	NM_005036	peroxisome proliferator-activated receptor alpha	22q12-q13.1
PRKCD	NM_006254	protein kinase C, delta	3p21.31
PROM2	NM_144707	prominin 2	2q11.1
PRR19	NM_199285	proline rich 19	19q13.2
PTPRE	NM_006504	protein tyrosine phosphatase, receptor type, E	10q26
R3HCC1	NM_001136108	R3H domain and coiled-coil containing 1	8p21.3
RASSF1	NM_007182	Ras association (RalGDS/AF-6) domain family member 1	3p21.3
RHPN1	NM_052924	rhophilin, Rho GTPase binding protein 1	8q24.3
RPL36	NM_033643	ribosomal protein L36	19p13.2
RPS6KA4	NM_001006944	ribosomal protein S6 kinase, 90kDa, polypeptide 4	11q11-q13
SALL1	NM_002968	sal-like 1 (Drosophila)	16q12.1
SF3A2	NM_007165	splicing factor 3a, subunit 2, 66kDa	19p13.3-p13.2
SFMBT2	NM_001029880	Scm-like with four mbt domains 2	10p15.1
SHMT2	NM_005412	serine hydroxymethyltransferase 2 (mitochondrial)	12q12-q14
SLC35E1	NM_024881	solute carrier family 35, member E1	19p13.11
SLC40A1	NM_014585	solute carrier family 40 (iron-regulated transporter), member 1	2q32
SOX10	NM_006941	SRY (sex determining region Y)-box 10	22q13.1
SYT8	NM_138567	synaptotagmin VIII	11p15.5
TARDBP	NM_007375	TAR DNA binding protein	1p36.22
TC2N	NM_001128595	tandem C2 domains, nuclear	14q32.12
TMEM30B	NM_001017970	transmembrane protein 30B	14q23.1
TOX2	NM_001098797	TOX high mobility group box family member 2	20q13.12
TTC7A	NM_020458	tetratricopeptide repeat domain 7A	2p16.3
WDR6	NM_018031	WD repeat domain 6	3p21.31
WDR8	NM_017818	WD repeat domain 8	1p36.3
ZNF136	NM_003437	zinc finger protein 136	19q13.2
ZNF414	NM_032370	zinc finger protein 414	19p13.2
ZNF503	NM_032772	zinc finger protein 503	10q22.3
ZNF581	NM_016535	zinc finger protein 581	19

## Sheet: DMR and K27
	Symbol	RefSeq ID	Approved Name	Chromosome	Exp	CD44.K27	CD24.K27
CD24.body.Met	GARNL4	NA	NA	NA	CD24-high	N	N
	ACHE	NM_015831	acetylcholinesterase (Yt blood group)	7q22	CD24-high	N	N
	C11orf35	NM_173573	chromosome 11 open reading frame 35	11	CD24-high	N	N
	CASZ1	NM_017766	castor zinc finger 1	1p36.22	CD24-high	N	N
	EPS8L1	NM_017729	EPS8-like 1	19q13.42	CD24-high	P	N
	C1orf113	NM_024676	chromosome 1 open reading frame 113	1p34.3	CD24-high	N	N
	PPP1R13L	NM_006663	protein phosphatase 1, regulatory (inhibitor) subunit 13 like	19q13.32	CD24-high	N	N
	PRKCZ	NM_002744	protein kinase C, zeta	1p36.33-p36.2	CD24-high	N	N
	PTPRF		protein tyrosine phosphatase, receptor type, F	1p34	CD24-high	N	N
	SH3RF2	NM_152550	SH3 domain containing ring finger 2	5q32	CD24-high	N	N
	VWA1	NM_022834	von Willebrand factor A domain containing 1	1p36.33	CD24-high	N	N
	RHBDL3	NM_138328	rhomboid, veinlet-like 3 (Drosophila)	17q11.2	CD44-high	N	P
	SERPINH1	NM_004353	serpin peptidase inhibitor, clade H, member 1,	11q13.5	CD44-high	N	N
CD44.body.Met	KRT19	NM_002276	keratin 19	17q21-q23	CD24-high	P	N
	MUC4	NM_018406	mucin 4, cell surface associated	3q29	CD24-high	P	N
	ACSF2	NM_025149	acyl-CoA synthetase family member 2	17q21.33	CD24-high	N	N
	KIAA1522		KIAA1522	1p35.1	CD24-high	N	N
	KLF5		Kruppel-like factor 5 (intestinal)	13q21.3	CD24-high	N	N
	SLC9A3R1		solute carrier family 9 (sodium/hydrogen exchanger), member 3 regulator 1	17q25.1	CD24-high	N	N
	SOX9	NM_000346	SRY (sex determining region Y)-box 9	17q23	CD24-high	N	N
	WWC1	NM_015238	WW and C2 domain containing 1	5q34	CD24-high	N	N
	C13orf33	NM_032849	chromosome 13 open reading frame 33	13q12.3	CD44-high	N	P
	COL4A2	NM_001846	collagen, type IV, alpha 2	13q34	CD44-high	N	P
	COL5A1	NM_000093	collagen, type V, alpha 1	9q34.2-q34.3	CD44-high	N	P
	FNDC1	NM_032532	fibronectin type III domain containing 1	6q25	CD44-high	N	P
	HLX	NM_021958	H2.0-like homeobox	1q41	CD44-high	N	P
	HSPA12B	NM_052970	heat shock 70kD protein 12B	20p13	CD44-high	N	P
	PEAR1	NM_001080471	platelet endothelial aggregation receptor 1	1q23.1	CD44-high	N	P
	SIX2		SIX homeobox 2	2p21	CD44-high	N	P
	TBX2	NM_005994	T-box 2	17q23	CD44-high	N	P
	ZEB2	NM_014795	zinc finger E-box binding homeobox 2	2q22.3	CD44-high	N	P
	DCHS1	NM_003737	dachsous 1 (Drosophila)	11p15.4	CD44-high	N	N
	TRAM2	NM_012288	translocation associated membrane protein 2	6p21.1-p12	CD44-high	N	N
CD24.prom.Met	CPAMD8	NM_015692	C3 and PZP-like, alpha-2-macroglobulin domain containing 8	19p13.12	CD24-high	P	N
	COL1A2	NM_000089	collagen, type I, alpha 2	7q21.3	CD44-high	N	P
	ACVRL1		activin A receptor type II-like 1	12q11-q14	CD44-high	N	N
	CNTNAP1	NM_003632	contactin associated protein 1	17q21	CD44-high	N	N
	HIC1	NM_006497	hypermethylated in cancer 1	17p13.3	CD44-high	N	N
	ITGA5		integrin, alpha 5 (fibronectin receptor, alpha polypeptide)	12q11-q13	CD44-high	N	N
	LAG3		lymphocyte-activation gene 3	12p13.3	CD44-high	N	N
	LGI4		leucine-rich repeat LGI family, member 4	19q13.13	CD44-high	N	N
	SPARC	NM_003118	secreted protein, acidic, cysteine-rich (osteonectin)	5q31-q33	CD44-high	N	N
CD44.Prom.Met	EDN1		endothelin 1	6p24.1	CD24-high	P	N
	EFCAB4A	NM_173584	EF-hand calcium binding domain 4A	11p15.5	CD24-high	N	N
	GATA3	NM_001002295	GATA binding protein 3	10p15	CD24-high	P	N
	KRT15	NM_002275	keratin 15	17q21-q23	CD24-high	N	N
	KRT7	NM_005556	keratin 7	12q12-q21	CD24-high	N	N
	EDN2	NM_001956	endothelin 2	1p34	CD24-high	N	N
	LOC642587	NA	NA	NA	CD24-high	N	N
	PROM2	NM_144707	prominin 2	2q11.1	CD24-high	N	N
	RHPN1		rhophilin, Rho GTPase binding protein 1	8q24.3	CD24-high	N	N
	SOX10	NM_006941	SRY (sex determining region Y)-box 10	22q13.1	CD24-high	N	N
	EBF3	NM_001005463	early B-cell factor 3	10q26.3	CD44-high	P	P
	ZNF503	NM_032772	zinc finger protein 503	10q22.3	CD44-high	N	N
	C10orf54	NM_022153	chromosome 10 open reading frame 54	10	CD44-high	N	N
	IMPAD1	NM_017813	inositol monophosphatase domain containing 1	8q12.1	CD44-high	N	N
	NBL1	NM_005380	neuroblastoma, suppression of tumorigenicity 1	1p36.3-p36.2	CD44-high	N	N
